# Supplementary material for: The Prognostic Value of the Expression of SMC4 mRNA in Breast Cancer
Source: Dis Markers. 2019 Nov 21;2019:2183057. doi: 10.1155/2019/2183057 (PMC6906798; doi:10.1155/2019/2183057)
Supplement: Supplementary Materials — There was only a trend that HER-2-positive patients with high mRNA expression of SMC4 may suffer lower survival rate whether ER/PR positive or not (all P > 0.05). [file 2183057.f1.zip]

Archive with 3 entries (3 files):
- 23 paired mRNA expression.xlsx
- from 2001 female TCGA.xlsx
- Supplementary Fig.eps
