# Supplementary material for: The Prognostic Value of the Expression of SMC4 mRNA in Breast Cancer
Source: Dis Markers. 2019 Nov 21;2019:2183057. doi: 10.1155/2019/2183057 (PMC6906798; doi:10.1155/2019/2183057)
Supplement: Supplementary Materials — There was only a trend that HER-2-positive patients with high mRNA expression of SMC4 may suffer lower survival rate whether ER/PR positive or not (all P > 0.05). [file 2183057.f1.zip › 23 paired mRNA expression.xlsx]

## Sheet: Sheet1
T1	T21	T3	T9	T10	T11	T24	T16	T17	T5	T6	T12	T13	T14	T20	T25	T7	T8	T23	T15	T2	T19	T26
1954	3027	1312	3560	953	2663	2646	2648	845	948	866	857	2421	1130	1429	1120	1699	1446	5074	2009	796	1020	1397
N1	N21	N3	N9	N10	N11	N24	N16	N17	N5	N6	N12	N13	N14	N20	N25	N7	N8	N23	N15	N2	N19	N26
411	793	413	453	495	751	591	411	444	290	234	189	606	907	579	721	448	635	397	566	395	566	485
