# Supplementary material for: The Prognostic Value of the Expression of SMC4 mRNA in Breast Cancer
Source: Dis Markers. 2019 Nov 21;2019:2183057. doi: 10.1155/2019/2183057 (PMC6906798; doi:10.1155/2019/2183057)
Supplement: Supplementary Materials — There was only a trend that HER-2-positive patients with high mRNA expression of SMC4 may suffer lower survival rate whether ER/PR positive or not (all P > 0.05). [file 2183057.f1.zip › from 2001 female TCGA.xlsx]

## Sheet: Sheet1
EntrezID	SMC4	SMC2170	menopause	initial_pathologic_dx_year	age_at_diagnosis	age>65	dead1	days	Months	pathologic_T	T1vsTelse	pathologic_N	N	iN	M	pathologic_stage	STAGE	ER	PR	her2_ihc	HER2	TNBC
TCGA-AR-A24L-01A-11R-A169-07	1750.33	0	-1	2005	26	0	0	2221	74	T2	0	N1	1	1	0	Stage IIB	0	1	1		0	0
TCGA-AR-A0TQ-01A-11R-A084-07	2445.81	1	-1	2006	27	0	0	1500	50	T3	0	N1	1	1	0	Stage IIIA	1	1	0		1	0
TCGA-E9-A1NE-01A-21R-A14M-07	1561.07	0	-1	2011	28	0	0	0	0	T2	0	N1	1	1	0	Stage IIB	0	1	1	0	0	0
TCGA-AO-A03M-01B-11R-A10J-07	943.205	0	-1	2006	29	0	0	1455	48	T1c	1	N0 (i-)	0	0	0	Stage I	0	1	1	0	0	0
TCGA-C8-A273-01A-11R-A16F-07	1296.08	0	-1	2010	29	0	0	6	0	T2	0	N1	1	1	0	Stage IIB	0	1	1	0	0	0
TCGA-AN-A041-01A-11R-A034-07	1385.46	0	-1	2010	29	0	0	7	0	T2	0	N1a	1	1	0	Stage IIB	0	1	0	1	1	0
TCGA-S3-A6ZH-01A-22R-A32P-07	2692.39	1		2013	29	0	0	263	8	T3	0	N3a	1	1		Stage IIIC	1	1	1		0	0
TCGA-AO-A129-01A-21R-A10J-07	3124.32	1	-1	2002	29	0	0	2923	97	T2	0	N1a	1	1	0	Stage IIB	0	0	0	0	0	1
TCGA-PL-A8LZ-01A-31R-A36F-07	3215.12	1	-1	2013	29	0	0	120	4	T4b	0	N2	1	1	0	Stage IIIB	1
TCGA-PL-A8LY-01A-11R-A41B-07	717.022	0	-1	2013	30	0	0	8	0	T3	0	N0	0	0	0	Stage IIB	0
TCGA-BH-A0DG-01A-21R-A12P-07	1426.23	0	-1	2007	30	0	0	713	23	T2	0	N0	0	0	0	Stage IIA	0	1	0	0	0	0
TCGA-BH-A0HA-01A-11R-A12P-07	837.296	0	-1	2008	31	0	0	856	28	T1c	1	N0 (i-)	0	0	0	Stage I	0	1	1		0	0
TCGA-AO-A03U-01B-21R-A10J-07	1299.97	0	-1	2001	31	0	1	1793	59	T1c	1	N0 (i-)	0	0	0	Stage I	0	0	0	0	0	1
TCGA-AN-A0FF-01A-11R-A034-07	3151.93	1	-1	2010	32	0	0	172	5	T1b	1	N0	0	0	0	Stage IA	0	1	1	0	0	0
TCGA-E9-A3QA-01A-61R-A22K-07	1671.13	0	-1	2011	33	0	0	19	0	T2	0	N0 (i-)	0	0	0	Stage IIA	0
TCGA-EW-A6S9-01A-22R-A33J-07	1016.83	0		2013	34	0	0	463	15	T1c	1	N1	1	1	0	Stage IIA	0	1	1	1	1	0
TCGA-E2-A106-01A-11R-A10J-07	1554.51	0	-1	2006	34	0	0	1555	51	T1c	1	N1mi	1	1	0	Stage IB	0	1	1		0	0
TCGA-A2-A25E-01A-11R-A169-07	1713.84	0	-1	2004	34	0	0	2511	83	T2	0	N2a	1	1	0	Stage IIIA	1	1	1		1	0
TCGA-A2-A04X-01A-21R-A034-07	2802.92	1	-1	2006	34	0	0	1349	44	T2	0	N0 (i-)	0	0	0	Stage IIA	0	1	1	1	1	0
TCGA-D8-A1XL-01A-11R-A14M-07	2918.44	1	-1	2010	34	0	0	319	10	T2	0	N1a	1	1		Stage IIB	0	1	1		0	0
TCGA-E2-A15S-01A-11R-A115-07	3069.45	1	1	2010	34	0	0	274	9	T2	0	N1	1	1	0	Stage IIB	0	1	0		0	0
TCGA-C8-A1HO-01A-11R-A13Q-07	3364.9	1	-1	2010	34	0	0	0	0	T3	0	N3	1	1	0	Stage IIIC	1	1	1	0	0	0
TCGA-C8-A137-01A-11R-A115-07	3462.56	1	-1	2010	34	0	0	34	1	T2	0	N1	1	1	0	Stage IIB	0	0	0	1	1	0
TCGA-AO-A03L-01A-41R-A056-07	4695.84	1	-1	2003	34	0	0	2442	81	T3	0	N2	1	1	0	Stage IIIA	1	1	1	1	1	0
TCGA-A2-A3XU-01A-12R-A22U-07	736.78	0	1	2006	35	0	1	912	30	T2	0	N1mi	1	1	0	Stage IIB	0	0	0		0	1
TCGA-A8-A07J-01A-11R-A00Z-07	872.686	0	-1	2009	35	0	0	365	12	T2	0	N1a	1	1	0	Stage IIB	0	1	1	0	0	0
TCGA-PL-A8LX-01A-11R-A41B-07	1100.26	0	-1	2013	35	0	0	5	0	T4	0	N1a	1	1	1	Stage IV	1
TCGA-BH-A0BL-01A-11R-A115-07	2893.06	1	-1	2007	35	0	0	1340	44	T1c	1	N0	0	0	0	Stage I	0	0	0	0	0	1
TCGA-AR-A0TU-01A-31R-A109-07	3824.07	1	-1	2006	35	0	0	360	12	T2	0	N0	0	0	0	Stage IIA	0	0	0	0	0	1
TCGA-E2-A14Y-01A-21R-A12D-07	4042.88	1	-1	2009	35	0	0	688	22	T2	0	N0	0	0	0	Stage IIA	0	1	1		1	0
TCGA-AO-A0JA-01A-11R-A056-07	916.858	0	-1	2009	36	0	0	346	11	T2	0	N3	1	1	0	Stage IIIC	1	1	1	0	0	0
TCGA-D8-A27N-01A-11R-A16F-07	933.212	0	-1	2011	36	0	0	146	4	T2	0	N2a	1	1	0	Stage IIIA	1	1	1	1	1	0
TCGA-AN-A04A-01A-21R-A034-07	1588.59	0	-1	2008	36	0	0	90	3	T2	0	N2	1	1	0	Stage IIIA	1	1	1	0	0	0
TCGA-D8-A1XD-01A-11R-A14D-07	1787.69	0	-1	2010	36	0	0	155	5	T1c	1	N2a	1	1	0	Stage IIIA	1	1	1	0	0	0
TCGA-A2-A04P-01A-31R-A034-07	2232.88	1	-1	2003	36	0	1	548	18	T2	0	N3c	1	1	0	Stage IIIC	1	0	0		0	1
TCGA-AO-A12F-01A-11R-A115-07	2260.14	1	-1	2006	36	0	0	1471	49	T2	0	N0 (i-)	0	0	0	Stage IIA	0	0	0	0	0	1
TCGA-OL-A66I-01A-21R-A29R-07	2367.45	1		2008	36	0	0	714	23	T1c	1	N1mi	1	1		Stage IIA	0	0	0		0	1
TCGA-AR-A0U1-01A-11R-A115-07	2750.99	1	-1	2004	36	0	0	2134	71	T2	0	N1	1	1	0	Stage IIB	0	0	0	0	0	1
TCGA-A2-A04R-01A-41R-A109-07	2790.55	1	-1	2004	36	0	0	2365	78	T1	1	N0 (i-)	0	0	0	Stage IA	0	1	1		0	0
TCGA-AN-A0XW-01A-11R-A109-07	3351.49	1	-1	2010	36	0	0	170	5	T2	0	N2	1	1	0	Stage IIIA	1	1	1	1	1	0
TCGA-E2-A1IO-01A-11R-A144-07	1327.4	0	-1	2009	37	0	0	498	16	T1c	1	N0	0	0	0	Stage I	0	1	1		0	0
TCGA-A7-A0D9-01A-31R-A056-07	1803.62	0	-1	2009	37	0	0	160	5	T2	0	N0 (i-)	0	0	0	Stage IIA	0	1	0	0	0	0
TCGA-A2-A0CL-01A-11R-A115-07	2060.42	0	-1	2006	37	0	0	1827	60	T3	0	N2a	1	1	0	Stage IIIA	1	1	1	0	0	0
TCGA-E9-A229-01A-31R-A157-07	2201.21	1	-1	2011	37	0	0	0	0	T1c	1	N0	0	0	0	Stage IA	0
TCGA-A2-A0D4-01A-11R-A00Z-07	3191.24	1	-1	2009	37	0	0	496	16	T2	0	N1a	1	1	0	Stage IIB	0	1	1	0	0	0
TCGA-A2-A0T3-01A-21R-A115-07	4026.56	1	-1	2009	37	0	0	456	15	T1c	1	N1mi	1	1	0	Stage IB	0	1	1		0	0
TCGA-E2-A14N-01A-31R-A137-07	6451.19	1	-1	2007	37	0	0	1350	45	T2	0	N1	1	1	0	Stage IIB	0	0	0	0	0	1
TCGA-E2-A15H-01A-11R-A12D-07	1828.97	0	-1	2009	38	0	0	42	1	T1c	1	N1mi	1	1	0	Stage IIA	0	1	1		1	0
TCGA-BH-A0E0-01A-11R-A056-07	2143.81	0	-1	2009	38	0	0	134	4	T3	0	N3a	1	1	0	Stage IIIC	1	0	0	0	0	1
TCGA-C8-A1HL-01A-11R-A137-07	2607.64	1		2010	38	0	0	2	0	T3	0	N1	1	1	0	Stage IIIA	1	1	0
TCGA-AR-A24M-01A-11R-A169-07	2643.64	1	-1	2005	38	0	0	1991	66	T2	0	N2	1	1	0	Stage IIIA	1	1	1	0	0	0
TCGA-EW-A1J1-01A-11R-A13Q-07	2879.05	1	-1	2010	38	0	0	282	9	T2	0	N1a	1	1	0	Stage IIB	0	1	1	0	0	0
TCGA-EW-A1IY-01A-11R-A13Q-07	3608.27	1	-1	2009	38	0	0	258	8	T1c	1	N0	0	0		Stage I	0	1	1	0	0	0
TCGA-E9-A22D-01A-11R-A157-07	3754.32	1	-1	2011	38	0	0	0	0	T2	0	N0	0	0	0	Stage IIA	0	1	1	1	1	0
TCGA-AO-A124-01A-11R-A10J-07	5722.43	1	-1	2002	38	0	0	3120	104	T2	0	N0 (i-)	0	0	0	Stage IIA	0	0	0	0	0	1
TCGA-OL-A66O-01A-11R-A31O-07	800.073	0	-1	2012	39	0	0	220	7	T2	0	N1a	1	1		Stage IIB	0	1	1		0	0
TCGA-AO-A126-01A-11R-A10J-07	867.969	0	-1	2002	39	0	0	2850	95	T2	0	N0 (i-)	0	0	0	Stage IIA	0	1	1	0	0	0
TCGA-A1-A0SH-01A-11R-A084-07	1000.03	0	-1	2006	39	0	0	1437	47	T2	0	N0 (i-)	0	0	0	Stage IIA	0	0	1		0	0
TCGA-A1-A0SJ-01A-11R-A084-07	1105.44	0		2006	39	0	0	416	13	T3	0	N1a	1	1	0	Stage IIIA	1	1	1		0	0
TCGA-BH-A0BQ-01A-21R-A115-07	1238.5	0	-1	2007	39	0	0	827	27	T1c	1	N0	0	0	0	Stage I	0	1	1	1	1	0
TCGA-BH-A18M-01A-11R-A12D-07	1606.99	0		2001	39	0	1	2207	73	T3	0	N1	1	1	0	Stage IIIA	1	1	1	1	1	0
TCGA-A2-A04V-01A-21R-A034-07	1695.66	0	-1	2005	39	0	1	1920	64	T2	0	N0 (i-)	0	0	0	Stage IIA	0	1	1		0	0
TCGA-A2-A0T5-01A-21R-A084-07	1720.07	0	-1	2009	39	0	0	321	10	T2	0	N0 (i-)	0	0	0	Stage IIA	0	1	1	0	0	0
TCGA-AR-A1AU-01A-11R-A12P-07	1833.22	0	-1	2007	39	0	0	1409	46	T2	0	N2	1	1	0	Stage IIIA	1	1	1		0	0
TCGA-A2-A0YJ-01A-11R-A109-07	2164.36	0	-1	2010	39	0	0	326	10	T3	0	N2a	1	1	0	Stage IIIA	1	1	0	0	0	0
TCGA-EW-A2FV-01A-11R-A17B-07	2827.13	1	-1	2011	39	0	0	239	7	T3	0	N3a	1	1		Stage IIIC	1	1	1	0	0	0
TCGA-A2-A25B-01A-11R-A169-07	6860.93	1	-1	2010	39	0	0	258	8	T2	0	N1	1	1	0	Stage IIB	0	1	1		0	0
TCGA-AR-A2LJ-01A-12R-A19W-07	762.915	0	-1	2007	40	0	0	1359	45	T3	0	N1	1	1		Stage IIIA	1	1	1	1	1	0
TCGA-OL-A5D8-01A-11R-A27Q-07	847.808	0	-1	2009	40	0	0	229	7	T3	0	N0	0	0		Stage IIB	0	1	1		0	0
TCGA-A7-A4SA-01A-11R-A266-07	1143.01	0	-1	2012	40	0	0	241	8	T2	0	N1a	1	1	0	Stage IIB	0	1	0	0	0	0
TCGA-D8-A141-01A-11R-A115-07	1314.16	0		2010	40	0	0	113	3	T1c	1	N1	1	1	0	[Not Available]		1	1	0	0	0
TCGA-AC-A2FF-01A-11R-A17B-07	1351.05	0		2006	40	0	0	1686	56	T2	0	N1	1	1		Stage IIB	0	1	1		0	0
TCGA-C8-A1HI-01A-11R-A137-07	1572.46	0	-1	2010	40	0	0	0	0	T2	0	N2	1	1	0	Stage IIIA	1	1	1	0	0	0
TCGA-AO-A0JM-01A-21R-A056-07	1584.42	0	-1	2005	40	0	0	1826	60	T2	0	N1	1	1	0	Stage IIB	0	1	1	1	1	0
TCGA-E2-A1L9-01A-11R-A13Q-07	1663.16	0	-1	2009	40	0	0	388	12	T1c	1	N1mi	1	1	0	Stage IIA	0	1	1	0	0	0
TCGA-A8-A09A-01A-11R-A00Z-07	1739.47	0	-1	2009	40	0	0	304	10	T2	0	NX			0	Stage X		1	1	0	0	0
TCGA-E2-A15E-01A-11R-A12D-07	1790.49	0	-1	2009	40	0	0	518	17	T1c	1	N1a	1	1	0	Stage IIA	0	1	1		1	0
TCGA-A1-A0SP-01A-11R-A084-07	2237.87	1		2007	40	0	0	584	19	T2	0	N0 (i-)	0	0	0	Stage IIA	0	0	0	0	0	1
TCGA-OL-A5RW-01A-11R-A28M-07	2813.16	1	-1	2010	40	0	0	797	26	T1c	1	N1	1	1		Stage IIA	0	0	0		0	1
TCGA-D8-A1X7-01A-11R-A14M-07	3241.8	1	-1	2010	40	0	0	85	2	T2	0	N0	0	0		Stage IIA	0	1	1	0	0	0
TCGA-BH-A0B5-01A-11R-A12P-07	3839.89	1	-1	2007	40	0	0	1471	49	T2	0	N2a	1	1	0	Stage IIIA	1	1	1	0	0	0
TCGA-D8-A27F-01A-11R-A16F-07	4316.35	1	-1	2010	40	0	0	106	3	T2	0	N0	0	0	0	Stage IIA	0	0	0	0	0	1
TCGA-E9-A1RB-01A-11R-A157-07	4544.22	1	-1	2011	40	0	0	21	0	T2	0	N0	0	0	0	Stage IIA	0
TCGA-A2-A0CM-01A-31R-A034-07	5393.33	1	-1	2003	40	0	1	754	25	T2	0	N0 (i-)	0	0	0	Stage IIA	0	0	0	0	0	1
TCGA-E2-A1L7-01A-11R-A144-07	6411.26	1	-1	2009	40	0	0	633	21	T2	0	N2	1	1	0	Stage IIIA	1	0	0	0	0	1
TCGA-BH-A42V-01A-11R-A24H-07	732.936	0	-1	2012	41	0	0	272	9	T1c	1	N1mi	1	1	0	Stage IB	0	1	1	0	0	0
TCGA-BH-A0BJ-01A-11R-A056-07	858.603	0	-1	2008	41	0	0	660	22	T2	0	N1a	1	1	0	Stage IIB	0	1	1	0	0	0
TCGA-E2-A1LB-01A-11R-A144-07	1048.19	0	-1	2008	41	0	0	972	32	T2	0	N1	1	1	0	Stage IIB	0	0	0	1	1	0
TCGA-AO-A03V-01A-11R-A115-07	1446.27	0	-1	2008	41	0	0	886	29	T1c	1	N0 (i-)	0	0	0	Stage I	0	1	1	0	0	0
TCGA-D8-A27R-01A-11R-A16F-07	1448.52	0	1	2011	41	0	0	29	0	T2	0	N3a	1	1	0	Stage IIIC	1	1	1		0	0
TCGA-A2-A0CV-01A-31R-A115-07	1514.3	0	1	2005	41	0	0	1870	62	T2	0	N1a	1	1	0	Stage IIB	0	1	1	0	0	0
TCGA-BH-A0DT-01A-21R-A12D-07	1624.86	0	-1	2007	41	0	0	1170	39	T1c	1	N1a	1	1	0	Stage IIA	0	1	1	0	0	0
TCGA-E9-A1N4-01A-11R-A14M-07	2019.67	0	-1	2010	41	0	0	5	0	T2	0	N2	1	1	0	Stage IIIA	1	1	1	1	1	0
TCGA-AC-A2BM-01A-11R-A21T-07	2036.57	0		2005	41	0	0	1162	38	T2	0	N1a	1	1		Stage IIB	0	1	1		0	0
TCGA-A8-A08G-01A-11R-A00Z-07	2236.92	1	-1	2009	41	0	0	607	20	T2	0	N0	0	0	0	Stage IIA	0	1	1	1	1	0
TCGA-EW-A2FS-01A-11R-A17B-07	2268.82	1	-1	2008	41	0	0	1173	39	T2	0	N1mi	1	1		Stage IIB	0	1	0	0	0	0
TCGA-AO-A0J2-01A-11R-A034-07	2304.89	1	-1	2008	41	0	0	585	19	T1c	1	N0 (i-)	0	0	0	Stage IA	0	0	0		0	1
TCGA-E9-A5UO-01A-11R-A28M-07	3101.33	1	-1	2012	41	0	0	7	0	T2	0	N0	0	0	0	Stage IIA	0
TCGA-AO-A0J4-01A-11R-A034-07	3450.64	1	-1	2009	41	0	0	294	9	T1c	1	N0 (i-)	0	0	0	Stage IA	0	0	0	0	0	1
TCGA-D8-A1JD-01A-11R-A13Q-07	3871.23	1	-1	2010	41	0	0	273	9	T2	0	N1a	1	1	0	Stage IIB	0	1	1	0	0	0
TCGA-AN-A0AL-01A-11R-A00Z-07	3929.55	1	-1	2010	41	0	0	198	6	T4	0	N0	0	0	0	Stage IIIB	1	0	0	0	0	1
TCGA-E2-A10A-01A-21R-A115-07	3940.21	1	-1	2007	41	0	0	352	11	T3	0	N0 (i-)	0	0	0	Stage IIB	0	1	1	1	1	0
TCGA-A2-A3XW-01A-11R-A239-07	334.514	0	-1	2009	42	0	0	1209	40	T2	0	N1a	1	1	0	Stage IIB	0	1	0	0	0	0
TCGA-AO-A03T-01A-21R-A034-07	1019.15	0	-1	2007	42	0	0	1187	39	T2	0	N1a	1	1	0	Stage IIB	0	1	1	0	0	0
TCGA-5L-AAT0-01A-12R-A41B-07	1049.42	0		2010	42	0	0	1477	49	T2	0	N0	0	0	0	Stage IIA	0	1	1	0	0	0
TCGA-A2-A0D3-01A-11R-A115-07	1116.56	0	1	2008	42	0	0	736	24	T1c	1	N0 (i-)	0	0	0	Stage IA	0	1	1	0	0	0
TCGA-AO-A12C-01A-11R-A10J-07	1712.63	0	-1	2005	42	0	0	1994	66	T2	0	N1a	1	1	0	Stage IIB	0	1	1	1	1	0
TCGA-BH-A0DQ-01A-11R-A084-07	1780.55	0	-1	2009	42	0	0	98	3	T2	0	N1	1	1	0	Stage IIB	0	1	1	0	0	0
TCGA-BH-A0B7-01A-12R-A115-07	2018.94	0	-1	2006	42	0	0	1733	57	T2	0	N1a	1	1	0	Stage IIB	0	1	1	1	1	0
TCGA-E9-A227-01A-11R-A157-07	2078.73	0	-1	2011	42	0	0	24	0	T2	0	N1	1	1	0	Stage IIB	0	1	1	0	0	0
TCGA-E2-A1IP-01A-11R-A14D-07	2935.48	1	-1	2010	42	0	0	428	14	T2	0	N1mi	1	1	0	Stage IIB	0	1	0	0	0	0
TCGA-A8-A075-01A-11R-A084-07	2961.64	1	-1	2009	42	0	0	518	17	T2	0	N1a	1	1	0	Stage IIB	0	1	1	1	1	0
TCGA-E9-A22H-01A-11R-A157-07	3015.57	1	-1	2011	42	0	0	0	0	T2	0	N1	1	1	0	Stage IIB	0	1	1	1	1	0
TCGA-OL-A5RV-01A-12R-A28M-07	685.872	0	-1	2011	43	0	0	733	24	T2	0	N3	1	1		Stage IIIC	1	1	1		0	0
TCGA-AC-A6NO-01A-12R-A33J-07	1138.39	0		2011	43	0	0	51	1	T2	0	N1a	1	1		Stage IIB	0	1	1	0	0	0
TCGA-E9-A1RI-01A-11R-A169-07	1162.19	0	-1	2011	43	0	0	48	1	T1c	1	N2	1	1	0	Stage IIIA	1
TCGA-E2-A3DX-01A-21R-A213-07	1212.47	0	-1	2011	43	0	0	217	7	T2	0	N3	1	1	0	Stage IIIC	1	1	1		1	0
TCGA-BH-A0B2-01A-11R-A10J-07	1233.28	0		2007	43	0	0	1242	41	T1a	1	N0	0	0	0	Stage I	0	1	1	0	0	0
TCGA-C8-A12T-01A-11R-A115-07	1897.38	0	-1	2010	43	0	0	0	0	T2	0	N0	0	0	0	Stage IIA	0	1	1	1	1	0
TCGA-BH-A0DZ-01A-11R-A00Z-07	1904.24	0	-1	2009	43	0	0	495	16	T2	0	N1a	1	1	0	Stage IIB	0	1	1	1	1	0
TCGA-AR-A24O-01A-11R-A169-07	1954.51	0	-1	2005	43	0	0	1998	66	T3	0	N2	1	1	0	Stage IIIA	1	1	1	0	0	0
TCGA-AO-A12D-01A-11R-A115-07	2365.01	1	-1	2005	43	0	0	1948	64	T1c	1	N1a	1	1	0	Stage IIA	0	0	0	1	1	0
TCGA-AR-A0TZ-01A-12R-A084-07	2466.62	1	-1	2004	43	0	0	2316	77	T2	0	N2	1	1	1	Stage IIIA	1	1	1		0	0
TCGA-E2-A158-01A-11R-A12D-07	2466.97	1	-1	2009	43	0	0	450	15	T1c	1	N1mi	1	1	0	Stage IIA	0	0	0	0	0	1
TCGA-A8-A08X-01A-21R-A00Z-07	2972.77	1	-1	2007	43	0	0	1034	34	T4d	0	N3a	1	1	0	Stage IIIC	1	0	0	1	1	0
TCGA-B6-A400-01A-11R-A239-07	3038.21	1		2008	43	0	0	215	7	T2	0	N2a	1	1	0	Stage IIIA	1	0	0	0	0	1
TCGA-EW-A1OX-01A-11R-A144-07	3533.42	1	-1	2009	43	0	0	562	18	T2	0	N0	0	0		Stage IIA	0	1	1	0	0	0
TCGA-OL-A6VO-01A-12R-A33J-07	3602.75	1		2012	43	0	0	480	16	T1c	1	N0	0	0		Stage IA	0	0	0	0	0	1
TCGA-AR-A0TP-01A-11R-A084-07	3825.85	1	-1	2003	43	0	0	2521	84	T2	0	N0	0	0	0	Stage IIA	0	1	0	0	0	0
TCGA-EW-A1P4-01A-21R-A144-07	6773.73	1	-1	2009	43	0	0	501	16	T2	0	N0 (i-)	0	0	0	Stage IIA	0	0	0	0	0	1
TCGA-B6-A409-01A-11R-A24H-07	630.843	0	-1	2008	44	0	1	573	19	T1c	1	N2a	1	1	0	Stage IIIA	1	0	0		0	1
TCGA-C8-A12Y-01A-11R-A12D-07	656.172	0	-1	2010	44	0	0	0	0	T2	0	N1	1	1	0	Stage IIB	0
TCGA-LD-A66U-01A-11R-A31O-07	759.176	0		2012	44	0	0	252	8	T2	0	N1mi	1	1		Stage IIB	0	1	1	0	0	0
TCGA-MS-A51U-01A-31R-A266-07	862.285	0		2012	44	0	0	85	2	T2	0	N1	1	1	0	Stage IIB	0	1	1	0	0	0
TCGA-GM-A3XN-01A-12R-A22U-07	1199.43	0	1	2007	44	0	0	1641	54	T1c	1	N2a	1	1	0	Stage IIIA	1	1	1	0	0	0
TCGA-E2-A15I-01A-21R-A137-07	1279.11	0	-1	2009	44	0	0	411	13	T2	0	N0	0	0	0	Stage IIA	0	1	1		0	0
TCGA-E2-A574-01A-11R-A29R-07	1425.36	0	-1	2011	44	0	0	605	20	T2	0	N0	0	0	0	Stage IIA	0	0	0		0	1
TCGA-A2-A25A-01A-12R-A16F-07	1720.79	0		2003	44	0	0	2968	98	T2	0	N0 (i-)	0	0	0	Stage IIA	0	1	1		0	0
TCGA-E2-A1L6-01A-11R-A13Q-07	2040.67	0	-1	2007	44	0	0	1312	43	T1c	1	N1mi	1	1	0	Stage IIA	0	1	1	0	0	0
TCGA-BH-A0B9-01A-11R-A056-07	2404.16	1	-1	2006	44	0	0	1572	52	T1c	1	N0 (i-)	0	0	0	Stage IA	0	0	0	0	0	1
TCGA-E2-A1B6-01A-31R-A12P-07	3368.59	1	-1	2008	44	0	0	338	11	T2	0	N0	0	0	0	Stage IIA	0	0	0		0	1
TCGA-A7-A13F-01A-11R-A12P-07	3787.95	1	-1	2010	44	0	0	196	6	T3	0	N1a	1	1	0	Stage IIIA	1	1	1		0	0
TCGA-HN-A2OB-01A-21R-A27Q-07	630.396	0	-1	2008	45	0	0	1849	61	T2	0	N1	1	1	0	Stage IIB	0	1	1	0	0	0
TCGA-AC-A2FK-01A-12R-A180-07	727.434	0		2006	45	0	0	1180	39	T2	0	N3a	1	1	0	Stage IIIC	1	1	1		0	0
TCGA-E2-A1IG-01A-11R-A144-07	1126.27	0	-1	2009	45	0	0	755	25	T2	0	N1mi	1	1	0	Stage IIB	0	1	1	0	0	0
TCGA-BH-A2L8-01A-11R-A18M-07	1180.21	0	-1	2011	45	0	0	168	5	T2	0	N0 (i-)	0	0	0	Stage IIA	0	1	1	0	0	0
TCGA-AN-A0FZ-01A-11R-A034-07	1246.95	0	-1	2010	45	0	0	10	0	T2	0	N2	1	1	0	Stage IIIA	1	1	0	1	1	0
TCGA-E9-A6HE-01A-11R-A31O-07	1337.81	0	-1	2012	45	0	0	92	3	T3	0	N3	1	1		Stage IIIC	1	1	1	0	0	0
TCGA-A8-A08O-01A-21R-A056-07	1349.99	0	-1	2008	45	0	0	943	31	T2	0	N3a	1	1	1	Stage IV	1	1	1	0	0	0
TCGA-E9-A1N5-01A-11R-A14D-07	1400.45	0	1	2010	45	0	0	0	0	T2	0	N1	1	1	0	Stage IIB	0	1	1	1	1	0
TCGA-BH-A0H5-01A-21R-A115-07	1437.91	0	1	2008	45	0	0	1080	36	T1c	1	N0 (i-)	0	0	0	Stage I	0	1	1		0	0
TCGA-A1-A0SQ-01A-21R-A144-07	1682.7	0	-1	2007	45	0	0	554	18	T2	0	N1	1	1		Stage IIB	0	1	1	0	0	0
TCGA-BH-A0AU-01A-11R-A12P-07	1941.79	0	-1	2008	45	0	0	746	24	T2	0	N0	0	0	0	Stage IIA	0	1	1	1	1	0
TCGA-E2-A15A-01A-11R-A12D-07	2131.33	0	-1	2009	45	0	0	502	16	T2	0	N3a	1	1	0	Stage IIIC	1	1	1	0	0	0
TCGA-E2-A1B1-01A-21R-A12P-07	2405.56	1	1	2007	45	0	0	1361	45	T2	0	N1	1	1	0	Stage IIB	0	1	1		1	0
TCGA-AR-A24R-01A-11R-A169-07	2413.07	1	-1	2006	45	0	0	1746	58	T1	1	N2	1	1	0	Stage IIIA	1	1	1	0	0	0
TCGA-E9-A249-01A-11R-A169-07	2555.28	1	-1	2011	45	0	0	29	0	T2	0	N0 (i-)	0	0	0	Stage IIA	0
TCGA-AQ-A04J-01A-02R-A034-07	2787.37	1	-1	2009	45	0	0	160	5	T2	0	N0 (i+)	0	1	0	Stage IIA	0	0	0	0	0	1
TCGA-A8-A095-01A-11R-A00Z-07	2953.82	1	-1	2007	45	0	0	1277	42	T1c	1	N0	0	0	0	Stage I	0	1	1	0	0	0
TCGA-C8-A12Z-01A-11R-A115-07	2958.08	1	-1	2010	45	0	0	12	0	T2	0	N1	1	1	0	Stage IIB	0	0	0	1	1	0
TCGA-A2-A3XT-01A-11R-A22U-07	3005.2	1	-1	2006	45	0	0	2238	74	T2	0	N1a	1	1	0	Stage IIB	0	0	0	0	0	1
TCGA-D8-A1XF-01A-11R-A14D-07	3085.18	1	-1	2010	45	0	0	97	3	T2	0	N0	0	0	0	Stage IIA	0	1	1	0	0	0
TCGA-D8-A147-01A-11R-A115-07	3531.72	1		2010	45	0	0	2	0	T2	0	N0	0	0	0	[Not Available]		0	0	0	0	1
TCGA-A2-A0D2-01A-21R-A034-07	4260.21	1	-1	2008	45	0	0	761	25	T2	0	N0 (i+)	0	1	0	Stage IIA	0	0	0	0	0	1
TCGA-E9-A226-01A-21R-A157-07	4442.43	1	-1	2011	45	0	0	16	0	T2	0	N2	1	1	0	Stage IIIA	1
TCGA-AR-A256-01A-11R-A169-07	6416.75	1	-1	2001	45	0	1	2854	95	T2	0	N0	0	0	0	Stage IIA	0	0	0	0	0	1
TCGA-GM-A3XG-01A-31R-A24H-07	384.489	0	-1	2009	46	0	0	982	32	T3	0	N1a	1	1	0	Stage IIIA	1	1	1	0	0	0
TCGA-BH-A6R8-01A-21R-A33J-07	497.801	0		2012	46	0	0	293	9	T2	0	N0	0	0	0	Stage IIA	0	1	1		0	0
TCGA-A2-A3XV-01A-21R-A239-07	543.656	0	-1	2011	46	0	0	428	14	T2	0	N0	0	0	0	Stage IIA	0	1	0		1	0
TCGA-A2-A0CZ-01A-11R-A034-07	633.809	0	-1	2007	46	0	0	1339	44	T2	0	N0 (i-)	0	0	0	Stage IIA	0	1	1	0	0	0
TCGA-LL-A5YN-01A-11R-A28M-07	694.88	0	1	2013	46	0	0	111	3	T2	0	N0 (i-)	0	0	0	Stage IIA	0	1	1		1	0
TCGA-AC-A3BB-01A-21R-A19W-07	694.96	0		2011	46	0	0	30	1	T3	0	N2a	1	1		Stage IIIA	1	1	1	0	0	0
TCGA-A2-A0EX-01A-21R-A034-07	766.2	0	1	2009	46	0	0	550	18	T3	0	N0 (i+)	0	1	0	Stage IIB	0	1	1	0	0	0
TCGA-A2-A4RY-01A-31R-A266-07	856.791	0	-1	2012	46	0	0	268	8	T3	0	N3a	1	1	0	Stage IIIC	1	1	1	0	0	0
TCGA-A2-A3XZ-01A-42R-A239-07	973.467	0	-1	2009	46	0	0	973	32	T1c	1	N0	0	0	0	Stage I	0	0	0	1	1	0
TCGA-E2-A1B5-01A-21R-A12P-07	1037.13	0	-1	2008	46	0	0	774	25	T2	0	N0	0	0	0	Stage IIA	0	1	1	0	0	0
TCGA-JL-A3YX-01A-11R-A22U-07	1049.24	0	1	2011	46	0	0	352	11	T2	0	N0	0	0	0	Stage IIA	0	1	1	1	1	0
TCGA-AO-A1KO-01A-31R-A13Q-07	1144.53	0	-1	2008	46	0	0	448	14	T3	0	N0 (i+)	0	1	0	Stage IIB	0	1	1	0	0	0
TCGA-BH-A0H3-01A-11R-A12P-07	1262.02	0	-1	2008	46	0	0	1149	38	T1c	1	N0	0	0	0	Stage I	0	1	1		0	0
TCGA-E2-A1LS-01A-12R-A157-07	1308.31	0	-1	2010	46	0	0	239	7	T1c	1	N0	0	0	0	Stage IA	0	0	0	0	0	1
TCGA-BH-A28Q-01A-11R-A16F-07	1424.05	0	-1	2010	46	0	0	196	6	T2	0	N1a	1	1	0	Stage IIB	0	1	1	0	0	0
TCGA-BH-A0W4-01A-11R-A109-07	1452.27	0		2010	46	0	0	175	5	T2	0	N0 (i-)	0	0	0	Stage IIA	0	1	1	0	0	0
TCGA-XX-A899-01A-11R-A36F-07	1525.98	0	1	2013	46	0	0	292	9	T1c	1	N2a	1	1		Stage IIIA	1	1	1	0	0	0
TCGA-AR-A2LO-01A-31R-A18M-07	1562.4	0	-1	2010	46	0	0	633	21	T2	0	N1	1	1	0	Stage IIB	0	1	1		0	0
TCGA-AR-A1AN-01A-11R-A12P-07	1707.42	0	-1	2006	46	0	0	1330	44	T2	0	N0	0	0	0	Stage IIA	0	1	1	0	0	0
TCGA-Z7-A8R6-01A-11R-A41B-07	2460.9	1	-1	2005	46	0	0	2800	93	T1c	1	N0	0	0	0	Stage I	0	1	1	0	0	0
TCGA-C8-A12U-01A-11R-A115-07	2550.61	1	-1	2010	46	0	0	0	0	T2	0	N1	1	1	0	Stage IIB	0	1	1	0	0	0
TCGA-AR-A24T-01A-11R-A169-07	2667.85	1	-1	2006	46	0	0	1620	54	T3	0	N3	1	1	0	Stage IIIC	1	1	1		0	0
TCGA-A7-A13D-01A-13R-A12P-07	2796.79	1	1	2010	46	0	0	267	8	T2	0	N0 (i-)	0	0	0	Stage IIA	0	0	1		0	0
TCGA-AR-A24K-01A-11R-A169-07	3419.46	1	-1	2004	46	0	0	1548	51	T2	0	N0	0	0	0	Stage IIA	0	1	1		0	0
TCGA-AR-A0TS-01A-11R-A115-07	3604.13	1	-1	2006	46	0	0	1138	37	T2	0	N1	1	1	0	Stage IIB	0	0	0	0	0	1
TCGA-BH-A0B6-01A-11R-A19W-07	758.46	0		2006	47	0	0	1732	57	T1c	1	N0	0	0	0	Stage I	0	1	1	1	1	0
TCGA-A7-A5ZW-01A-12R-A29R-07	1014.85	0	-1	2012	47	0	0	134	4	T1c	1	N1a	1	1	0	Stage IIA	0	1	1	0	0	0
TCGA-E2-A15D-01A-11R-A115-07	1085.81	0	-1	2009	47	0	0	316	10	T2	0	N0	0	0	0	Stage IIA	0	1	1		0	0
TCGA-B6-A401-01A-11R-A239-07	1197.4	0		2007	47	0	0	1989	66	T1c	1	N1a	1	1	0	Stage IIA	0	1	1	0	0	0
TCGA-S3-AA14-01A-11R-A41B-07	1218.32	0	1	2013	47	0	0	218	7	T1	1	N0 (i+)	0	1	0	Stage I	0	1	1	1	1	0
TCGA-AO-A12A-01A-21R-A115-07	1275.67	0	-1	2003	47	0	0	2755	91	T2	0	N0 (i+)	0	1	0	Stage IIA	0	1	1	0	0	0
TCGA-AC-A6IV-01A-12R-A33J-07	1348.89	0		2012	47	0	0	36	1	T2	0	N1	1	1		Stage IIB	0	1	1
TCGA-D8-A27K-01A-11R-A16F-07	1353.96	0	1	2011	47	0	0	119	3	T2	0	N1a	1	1	0	Stage IIB	0	1	1	0	0	0
TCGA-E2-A570-01A-11R-A29R-07	1430.18	0	-1	2011	47	0	0	549	18	T1c	1	N1mi	1	1	0	Stage IB	0	1	1		0	0
TCGA-E9-A245-01A-22R-A16F-07	1448.13	0	-1	2011	47	0	0	26	0	T2	0	N1	1	1	0	Stage IIB	0
TCGA-BH-A0AZ-01A-21R-A12P-07	1589.84	0	-1	2008	47	0	0	867	28	T3	0	N1a	1	1	0	Stage IIIA	1	1	1	0	0	0
TCGA-AR-A1AO-01A-11R-A12P-07	1685.42	0	-1	2006	47	0	0	1325	44	T1	1	N1	1	1	0	Stage IIA	0	1	0	0	0	0
TCGA-BH-A0C3-01A-21R-A12P-07	1730.54	0	-1	2006	47	0	0	1464	48	T1c	1	N0	0	0	0	Stage I	0	1	0	0	0	0
TCGA-A8-A09D-01A-11R-A00Z-07	1749.4	0	1	2007	47	0	0	396	13	T2	0	N1	1	1	0	Stage IIB	0	1	1	0	0	0
TCGA-A2-A04U-01A-11R-A115-07	1841.28	0	-1	2004	47	0	0	671	22	T2	0	N0 (i+)	0	1	0	Stage IIA	0	0	0	0	0	1
TCGA-A2-A3KD-01A-12R-A213-07	1843.19	0	-1	2010	47	0	0	804	26	T3	0	N1mi	1	1	0	Stage IIIA	1	1	1	0	0	0
TCGA-E2-A10F-01A-11R-A10J-07	2029.97	0	-1	2008	47	0	0	360	12	T2	0	N0 (i-)	0	0	0	Stage IIA	0	1	1		0	0
TCGA-C8-A26V-01A-11R-A16F-07	2151.66	0	-1	2010	47	0	0	9	0	T3	0	N2	1	1	0	Stage IIIA	1	1	1	0	0	0
TCGA-B6-A402-01A-11R-A239-07	2611.65	1		2008	47	0	0	1651	55	T1c	1	N0 (i-)	0	0	0	Stage I	0	0	0	0	0	1
TCGA-AR-A24U-01A-11R-A169-07	2684.93	1	-1	2006	47	0	0	1623	54	T1	1	N1	1	1	0	Stage IIA	0	0	0	1	1	0
TCGA-BH-A0BD-01A-11R-A034-07	2861.02	1	-1	2009	47	0	0	554	18	T1c	1	N1a	1	1	0	Stage IIA	0	1	1	0	0	0
TCGA-AR-A24P-01A-11R-A169-07	2956.75	1	1	2005	47	0	0	26	0	T1	1	N0	0	0	0	Stage I	0	1	1		0	0
TCGA-AR-A1AI-01A-11R-A12P-07	4476.85	1	1	2005	47	0	0	1881	62	T2	0	N0	0	0	0	Stage IIA	0	0	0		0	1
TCGA-E9-A22G-01A-11R-A157-07	4743.22	1	1	2011	47	0	0	0	0	T2	0	N0	0	0	0	Stage IIA	0	0	0	1	1	0
TCGA-AR-A0U2-01A-11R-A109-07	4916.35	1	-1	2004	47	0	1	2551	85	T2	0	N2	1	1	0	Stage IIIA	1	1	1	0	0	0
TCGA-E9-A3X8-01A-31R-A22U-07	543.509	0	1	2011	48	0	0	23	0	T2	0	N1	1	1	0	Stage IIB	0	1	1	1	1	0
TCGA-EW-A1IX-01A-12R-A144-07	730.981	0	-1	2008	48	0	0	1082	36	T1b	1	N1a	1	1		Stage IIA	0	1	1	0	0	0
TCGA-AC-A2QJ-01A-12R-A19W-07	733.999	0	-1	2011	48	0	0	69	2	T4b	0	N0	0	0	0	Stage IIIB	1	0	0	0	0	1
TCGA-A7-A5ZX-01A-12R-A29R-07	838.056	0		2012	48	0	0	132	4	T2	0	N3a	1	1	0	Stage IIIC	1	1	1	0	0	0
TCGA-A7-A6VY-01A-12R-A33J-07	1026.29	0	1	2013	48	0	0	125	4	T2	0	N1	1	1	0	Stage IIB	0	0	0	0	0	1
TCGA-OL-A6VR-01A-32R-A33J-07	1101.31	0		2011	48	0	0	848	28	T1b	1	N0	0	0		Stage IA	0	1	1	0	0	0
TCGA-AO-A0J5-01A-11R-A034-07	1550.6	0	-1	2008	48	0	0	735	24	T4	0	N1a	1	1	1	Stage IV	1	1	0		0	0
TCGA-BH-A0HO-01A-11R-A034-07	1639.99	0	-1	2009	48	0	0	76	2	T1c	1	N1a	1	1	0	Stage IIA	0	1	1	0	0	0
TCGA-AQ-A04L-01B-21R-A10J-07	1710.39	0	-1	2001	48	0	0	3359	111	T2	0	N0 (i-)	0	0		Stage IIA	0	1	0	1	1	0
TCGA-A2-A04Q-01A-21R-A034-07	1914.38	0	1	2004	48	0	0	2179	72	T1	1	N0 (i-)	0	0	0	Stage IA	0	0	0		0	1
TCGA-E9-A1RA-01A-11R-A14D-07	1926.08	0	-1	2011	48	0	0	29	0	T1c	1	N0	0	0	0	Stage IA	0
TCGA-A2-A0YL-01A-21R-A109-07	2047.89	0	-1	2010	48	0	0	268	8	T3	0	N2a	1	1	0	Stage IIIA	1	1	1	0	0	0
TCGA-A7-A6VW-01A-21R-A33J-07	2118.5	0	1	2013	48	0	0	176	5	T2	0	N0	0	0	0	Stage IIA	0	0	0	0	0	1
TCGA-E9-A1N8-01A-11R-A144-07	2474.4	1	1	2010	48	0	0	0	0	T2	0	N0	0	0	0	Stage IIA	0	0		0	0
TCGA-A2-A0YE-01A-11R-A109-07	2578.26	1	1	2010	48	0	0	253	8	T2	0	N1a	1	1	0	Stage IIB	0	0	0	0	0	1
TCGA-D8-A1J9-01A-11R-A13Q-07	2664.84	1	1	2010	48	0	0	248	8	T1c	1	N0	0	0	0	Stage IA	0	1	0	1	1	0
TCGA-EW-A1P3-01A-11R-A144-07	2762.54	1		2008	48	0	0	987	32	T2	0	N0	0	0		Stage IIA	0	1	1	0	0	0
TCGA-C8-A1HF-01A-11R-A137-07	2955.45	1	-1	2010	48	0	0	0	0	T2	0	N0	0	0	0	Stage IIA	0	0	1	1	1	0
TCGA-A8-A092-01A-11R-A00Z-07	3089.67	1	-1	2008	48	0	0	487	16	T2	0	N2a	1	1	0	Stage IIIA	1	1	1	0	0	0
TCGA-BH-A0C7-01B-11R-A115-07	3358.38	1	-1	2006	48	0	0	1305	43	T2	0	N1mi	1	1	0	Stage IIB	0	1	0		1	0
TCGA-E2-A150-01A-11R-A12D-07	3995.55	1	1	2009	48	0	0	591	19	T2	0	N0	0	0	0	Stage IIA	0	0	0	0	0	1
TCGA-E2-A573-01A-11R-A29R-07	4295.23	1	-1	2011	48	0	0	677	22	T1c	1	N0	0	0	0	Stage IA	0	0	0		0	1
TCGA-C8-A27B-01A-11R-A169-07	5276.17	1	-1	2011	48	0	0	30	1	T3	0	N0	0	0	0	Stage IIB	0	0	0	0	0	1
TCGA-C8-A27A-01A-11R-A169-07	5914.36	1	-1	2010	48	0	0	371	12	T2	0	N1	1	1	0	Stage IIB	0	1	1	0	0	0
TCGA-A2-A0SX-01A-12R-A084-07	6024.73	1	-1	2007	48	0	0	1288	42	T1c	1	N0 (i-)	0	0	0	Stage IA	0	0	0	0	0	1
TCGA-BH-A18V-01A-11R-A12D-07	7915.49	1		2001	48	0	1	1556	51	T2	0	N1b	1	1	0	Stage IIB	0	0	0	0	0	1
TCGA-LL-A7SZ-01A-32R-A352-07	647.387	0	-1	2013	49	0	0	170	5	T2	0	N1a	1	1		Stage IIB	0	1	1	0	0	0
TCGA-AC-A6IX-01A-12R-A32P-07	697.111	0	-1	2013	49	0	0	13	0	T2	0	N3a	1	1		Stage IIIC	1	1	1
TCGA-A2-A1G0-01A-11R-A13Q-07	853.386	0	-1	2010	49	0	0	380	12	T2	0	N1a	1	1	0	Stage IIB	0	1	1		0	0
TCGA-A2-A3XY-01A-11R-A239-07	916.976	0	1	2010	49	0	0	786	26	T2	0	N1a	1	1	0	Stage IIB	0	0	0	0	0	1
TCGA-JL-A3YW-01A-12R-A239-07	1088.26	0	1	2011	49	0	0	360	12	T2	0	N1	1	1	0	Stage IIB	0	1	1	1	1	0
TCGA-OL-A6VQ-01A-12R-A41B-07	1113.21	0	-1	2012	49	0	0	229	7	T2	0	N0	0	0		Stage IIA	0	1	1		0	0
TCGA-A2-A3XX-01A-21R-A239-07	1160.48	0	1	2009	49	0	0	1168	38	T2	0	N0	0	0	0	Stage IIA	0	0	0	0	0	1
TCGA-D8-A27L-01A-11R-A16F-07	1279.99	0	1	2011	49	0	0	126	4	T1c	1	N2a	1	1	0	Stage IIIA	1	1	1	0	0	0
TCGA-A2-A4RW-01A-21R-A266-07	1320.82	0	-1	2011	49	0	0	222	7	T2	0	N3a	1	1	0	Stage IIIC	1	1	1	0	0	0
TCGA-AR-A2LM-01A-11R-A180-07	1467.85	0	-1	2007	49	0	0	1218	40	T1	1	N1	1	1	0	Stage II	0	1	1		0	0
TCGA-C8-A12W-01A-11R-A115-07	1485.11	0	-1	2010	49	0	0	7	0	T4	0	N1	1	1	0	Stage IIIB	1	1	1	0	0	0
TCGA-LL-A5YP-01A-21R-A28M-07	1536.62	0		2013	49	0	0	99	3	T2	0	N1a	1	1	0	Stage IIB	0	1	0	0	0	0
TCGA-C8-A8HR-01A-11R-A36F-07	1554.08	0	-1	2013	49	0	0	10	0	T3	0	N2	1	1	0	Stage IIIA	1
TCGA-BH-A0W7-01A-11R-A115-07	1707.62	0		2008	49	0	0	558	18	T1c	1	N0 (i-)	0	0	0	Stage I	0	1	1	0	0	0
TCGA-AO-A0JG-01A-31R-A084-07	1880.66	0	1	2009	49	0	0	449	14	T2	0	N2a	1	1	0	Stage IIIA	1	1	1	0	0	0
TCGA-A7-A26J-01A-11R-A169-07	1911.48	0	-1	2011	49	0	0	68	2	T2	0	N0	0	0	0	Stage IIA	0	1	1	0	0	0
TCGA-BH-A0DK-01A-21R-A056-07	2243.47	1	-1	2009	49	0	0	423	14	T2	0	N0 (i-)	0	0	0	Stage IIA	0	1	1	0	0	0
TCGA-AQ-A1H3-01A-31R-A13Q-07	2351.79	1	-1	2010	49	0	0	162	5	T2	0	N3a	1	1		Stage IIIC	1	1	1	0	0	0
TCGA-E9-A3HO-01A-11R-A213-07	2576.65	1	-1	2011	49	0	0	19	0	T2	0	N0 (i-)	0	0	0	Stage IIA	0
TCGA-BH-A0E2-01A-11R-A056-07	2922.29	1	-1	2009	49	0	0	376	12	T2	0	N2a	1	1	0	Stage IIIA	1	1	1	0	0	0
TCGA-AR-A1AQ-01A-11R-A12P-07	3308.37	1	1	2007	49	0	0	1310	43	T2	0	N0	0	0	0	Stage IIA	0	0	0		0	1
TCGA-AR-A2LR-01A-12R-A18M-07	3387.44	1		2010	49	0	0	620	20	T1	1	N0	0	0	0	Stage I	0	0	0	0	0	1
TCGA-AR-A24Q-01A-12R-A169-07	3487.05	1	1	2006	49	0	0	2009	66	T3	0	N0	0	0	0	Stage IIB	0	1	0	0	0	0
TCGA-GM-A3XL-01A-11R-A22U-07	3904.47	1	1	2007	49	0	0	1717	57	T2	0	N0 (i-)	0	0	0	Stage IIA	0	0	0		0	1
TCGA-BH-A28O-01A-11R-A22K-07	703.865	0		2010	50	0	0	324	10	T3a	0	N3	1	1	0	Stage IIIC	1	1	1	0	0	0
TCGA-AR-A0TW-01A-11R-A084-07	923.229	0	-1	2005	50	0	0	739	24	T3	0	N1	1	1	0	Stage IIIA	1	1	1		0	0
TCGA-A2-A1G6-01A-11R-A13Q-07	977.652	0	-1	2010	50	0	0	132	4	T2	0	N2a	1	1	0	Stage IIIA	1	0	0	0	0	1
TCGA-4H-AAAK-01A-12R-A41B-07	1044.68	0	1	2013	50	0	0	158	5	T2	0	N2a	1	1	0	Stage IIIA	1	1	1
TCGA-AO-A0JB-01A-11R-A32Y-07	1113.54	0	-1	2007	50	0	0	1150	38	T3	0	N1a	1	1	0	Stage IIIA	1	1	1	0	0	0
TCGA-AC-A23E-01A-11R-A157-07	1128.71	0		2010	50	0	0	72	2	T2	0	N1	1	1		Stage IIB	0	1	1
TCGA-EW-A1PF-01A-11R-A144-07	1222.02	0	1	2010	50	0	0	140	4	T1c	1	N0	0	0	0	Stage IA	0	1	1	0	0	0
TCGA-A2-A04W-01A-31R-A115-07	1228.69	0	-1	2005	50	0	0	1918	63	T2	0	N1mi	1	1	0	Stage IIB	0	0	0	1	1	0
TCGA-A2-A0T6-01A-11R-A084-07	1381.8	0	-1	2009	50	0	0	344	11	T3	0	N0 (i-)	0	0	0	Stage IIB	0	1	1	0	0	0
TCGA-A7-A426-01A-22R-A24H-07	1398.23	0		2012	50	0	0	229	7	T3	0	N3a	1	1		Stage IIIC	1	1	1	0	0	0
TCGA-B6-A3ZX-01A-11R-A239-07	1446.18	0		2007	50	0	0	1132	37	T3	0	N1	1	1	1	Stage IV	1	0	0	0	0	1
TCGA-LL-A5YO-01A-21R-A28M-07	1482.58	0	-1	2013	50	0	0	97	3	T1b	1	N0	0	0		Stage IA	0	0	0	0	0	1
TCGA-LL-A6FR-01A-12R-A31O-07	1631.01	0	1	2013	50	0	0	118	3	T2	0	N0 (i-)	0	0		Stage IIA	0	0	1		1	0
TCGA-C8-A12O-01A-11R-A115-07	1639.39	0	-1	2010	50	0	0	0	0	T2	0	N0 (i-)	0	0	0	Stage IIA	0	1	1	0	0	0
TCGA-EW-A1J2-01A-21R-A13Q-07	1648.36	0	-1	2010	50	0	0	140	4	T1c	1	N1mi	1	1		Stage IIB	0	1	1	0	0	0
TCGA-E2-A14Q-01A-11R-A12D-07	1751.74	0	-1	2008	50	0	0	974	32	T2	0	N1mi	1	1	0	Stage IIA	0	1	1	0	0	0
TCGA-AR-A252-01A-11R-A169-07	1853.33	0	-1	2007	50	0	0	1236	41	T1	1	N0	0	0	0	Stage I	0	1	1	0	0	0
TCGA-A1-A0SN-01A-11R-A144-07	1898.33	0	1	2007	50	0	0	1196	39	T1c	1	N1	1	1		Stage IIA	0	1	1	1	1	0
TCGA-A2-A25C-01A-11R-A169-07	1976.62	0	-1	2010	50	0	0	285	9	T2	0	N1a	1	1	0	Stage IIB	0	1	1	0	0	0
TCGA-BH-A18F-01A-11R-A12D-07	2420.56	1	-1	2010	50	0	0	268	8	T2	0	N0	0	0	0	Stage IIA	0	1	1	0	0	0
TCGA-BH-A18R-01A-11R-A12D-07	2571.77	1		2001	50	0	1	1142	38	T2b	0	N1	1	1	0	Stage IIA	0		0	1	1
TCGA-BH-A18L-01A-32R-A12D-07	2615.61	1		2003	50	0	1	811	27	T3	0	N1mi	1	1	0	Stage IIIA	1	1	1	0	0	0
TCGA-3C-AALI-01A-11R-A41B-07	2649.27	1	1	2003	50	0	0	3801	126	T2	0	N1a	1	1	0	Stage IIB	0	1	1	1	1	0
TCGA-GM-A2DL-01A-11R-A18M-07	2827.28	1	-1	2003	50	0	0	2763	92	T1c	1	N0 (i-)	0	0	0	Stage I	0	1	1	0	0	0
TCGA-A7-A26G-01A-21R-A169-07	2933.17	1	-1	2010	50	0	0	210	7	T2	0	N0 (i+)	0	1	0	Stage IIA	0	0	0	0	0	1
TCGA-AR-A254-01A-21R-A169-07	3080.72	1	-1	2007	50	0	0	1212	40	T2	0	N2	1	1	0	Stage IIIA	1	1	1	1	1	0
TCGA-C8-A1HG-01A-11R-A137-07	3346.77	1	-1	2010	50	0	0	0	0	T2	0	N0	0	0	0	Stage IIA	0	1	1	0	0	0
TCGA-E2-A159-01A-11R-A115-07	4020.72	1	-1	2009	50	0	0	515	17	T2	0	N0	0	0	0	Stage IIA	0	0	0		0	1
TCGA-E2-A1B0-01A-11R-A12P-07	4925.36	1	1	2007	50	0	0	1271	42	T2	0	N2	1	1	0	Stage IIIA	1	0	0	1	1	0
TCGA-E2-A1LG-01A-21R-A14M-07	5724.2	1		2010	50	0	0	350	11	T2	0	N0	0	0	0	Stage IIA	0	0	0		0	1
TCGA-AR-A1AR-01A-31R-A137-07	6693.28	1		2007	50	0	1	524	17	T1	1	N2	1	1	0	Stage IIIA	1	0	0	0	0	1
TCGA-EW-A424-01A-11R-A24H-07	813.911	0		2012	51	0	0	322	10	T3	0	N1	1	1		Stage IIIA	1	1	1	1	1	0
TCGA-OL-A5RX-01A-11R-A28M-07	1032.4	0	-1	2011	51	0	0	513	17	T1c	1	N0	0	0		Stage IA	0	1	1		0	0
TCGA-E2-A153-01A-12R-A12D-07	1091.21	0	-1	2009	51	0	0	586	19	T1c	1	N1a	1	1	0	Stage IIB	0	1	1	0	0	0
TCGA-E9-A1R2-01A-11R-A14D-07	1221.25	0	1	2011	51	0	0	19	0	T2	0	N3	1	1		Stage IIIC	1	1	0		0	0
TCGA-D8-A1JU-01A-11R-A13Q-07	1281.16	0	1	2010	51	0	0	106	3	T1c	1	N0	0	0	0	Stage IA	0	1	1	0	0	0
TCGA-E2-A15J-01A-11R-A12P-07	1321.91	0	-1	2009	51	0	0	464	15	T1c	1	N0	0	0	0	Stage I	0	1	1		0	0
TCGA-AQ-A54N-01A-11R-A266-07	1361.7	0		2011	51	0	0	78	2	T2	0	N0	0	0	0	Stage IIA	0	0	0		0	1
TCGA-AN-A04C-01A-21R-A034-07	1577.58	0	1	2008	51	0	0	54	1	T2	0	N1	1	1	0	Stage IIB	0	0	0	1	1	0
TCGA-BH-A0EI-01A-11R-A115-07	1631.13	0	-1	2008	51	0	0	743	24	T1c	1	N1a	1	1	0	Stage IIA	0	1	1	0	0	0
TCGA-AC-A7VB-01A-11R-A352-07	1731.93	0		2013	51	0	0	74	2	T1c	1	N1a	1	1		Stage IIA	0	1	0
TCGA-E9-A1NI-01A-11R-A14D-07	1788.84	0	1	2011	51	0	0	-7	-1	T2	0	N0	0	0	0	Stage IIA	0	1	1	0	0	0
TCGA-B6-A40C-01A-11R-A239-07	1833.72	0		2005	51	0	0	1673	55	T3	0	N0 (i-)	0	0	0	Stage IIB	0	1	1	0	0	0
TCGA-A2-A0T7-01A-21R-A084-07	1937.17	0	-1	2009	51	0	0	397	13	T2	0	N0 (i+)	0	1	0	Stage IIA	0	1	1	0	0	0
TCGA-AR-A1AH-01A-11R-A12D-07	1958.94	0	1	2004	51	0	0	2298	76	T2	0	N1	1	1	0	Stage IIB	0	1	0	0	0	0
TCGA-AO-A12E-01A-11R-A10J-07	2037.7	0	-1	2005	51	0	0	1743	58	T3	0	N0 (i+)	0	1	0	Stage IIB	0	1	1	0	0	0
TCGA-D8-A13Z-01A-11R-A115-07	2224.83	1	1	2010	51	0	0	210	7	T2	0	N2a	1	1	0	[Not Available]		0	0	0	0	1
TCGA-S3-AA15-01A-11R-A41B-07	2300.12	1	1	2013	51	0	0	209	6	T2	0	N1a	1	1	0	Stage IIB	0	0	0	0	0	1
TCGA-BH-A0BA-01A-11R-A056-07	2647.59	1	-1	2006	51	0	0	1132	37	T3	0	N3a	1	1	0	Stage IIIC	1	1	1	0	0	0
TCGA-E2-A1II-01A-11R-A144-07	2844.63	1	1	2008	51	0	0	850	28	T1c	1	N0	0	0	0	Stage I	0	0	1	0	0	0
TCGA-A7-A6VV-01A-22R-A33J-07	2860.61	1	-1	2013	51	0	0	181	6	T2	0	N0	0	0	0	Stage IIA	0	0	0	0	0	1
TCGA-A8-A09V-01A-11R-A034-07	3180.09	1	-1	2009	51	0	0	457	15	T2	0	N0	0	0	0	Stage IIA	0	1	1	0	0	0
TCGA-BH-A5IZ-01A-11R-A27Q-07	3499.17	1	1	2012	51	0	0	98	3	T2	0	N1a	1	1	0	Stage IIB	0	1	0	0	0	0
TCGA-AO-A1KR-01A-12R-A144-07	3935.79	1	-1	2005	51	0	0	2141	71	T2	0	N0	0	0	0	Stage IIA	0	0	0	0	0	1
TCGA-A8-A07O-01A-11R-A00Z-07	4150.72	1	1	2009	51	0	0	304	10	T2	0	N0	0	0	0	Stage IIA	0	0	0	0	0	1
TCGA-D8-A143-01A-11R-A115-07	4987.4	1	1	2010	51	0	0	172	5	T2	0	N0	0	0	0	Stage IIA	0	0	0	0	0	1
TCGA-E9-A248-01A-11R-A169-07	6102.3	1	-1	2011	51	0	0	22	0	T2	0	N0 (i-)	0	0	0	Stage IIA	0
TCGA-AR-A251-01A-12R-A169-07	8211.26	1	-1	2006	51	0	0	1374	45	T2	0	N2	1	1	0	Stage IIIA	1	1	0		0	0
TCGA-AR-A1AM-01A-41R-A22K-07	799.813	0	1	2006	52	0	0	1903	63	T3	0	N1	1	1	0	Stage IIIA	1	1	1		0	0
TCGA-LD-A7W5-01A-22R-A352-07	807.31	0	-1	2013	52	0	0	124	4	T2	0	N3a	1	1	0	Stage IIIC	1	1	1	0	0	0
TCGA-A2-A0ES-01A-11R-A115-07	1015.32	0	1	2008	52	0	0	1001	33	T2	0	N0 (i-)	0	0	0	Stage IIA	0	1	1	0	0	0
TCGA-E2-A14T-01A-11R-A115-07	1029.12	0	1	2008	52	0	0	890	29	T2	0	N0	0	0	0	Stage IIA	0	1	1	0	0	0
TCGA-OL-A5RY-01A-21R-A28M-07	1211.52	0	1	2011	52	0	0	429	14	T1c	1	N1	1	1		Stage IIA	0	1	0		1	0
TCGA-A2-A0CX-01A-21R-A00Z-07	1251.94	0	-1	2006	52	0	0	1303	43	T2	0	N0 (i-)	0	0	0	Stage IIA	0	1	0	1	1	0
TCGA-3C-AALK-01A-11R-A41B-07	1300.37	0		2011	52	0	0	1217	40	T1c	1	N0 (i+)	0	1	0	Stage IA	0	1	1	1	1	0
TCGA-GM-A2DI-01A-31R-A18M-07	1331.49	0	-1	2005	52	0	0	1883	62	T1c	1	N0 (i+)	0	1	0	Stage I	0	0	0		0	1
TCGA-A8-A08J-01A-11R-A00Z-07	1486.69	0	1	2005	52	0	1	1127	37	T4b	0	N3	1	1	1	Stage IV	1	1	0	0	0	0
TCGA-5T-A9QA-01A-11R-A41B-07	1620.82	0		2013	52	0	0	12	0	T2	0	NX				Stage IIA	0	1	0		0	0
TCGA-AR-A24V-01A-21R-A169-07	1733.21	0	-1	2006	52	0	0	1648	54	T2	0	N1	1	1	0	Stage IIB	0	1	1	0	0	0
TCGA-AR-A24X-01A-11R-A169-07	1885.62	0	-1	2006	52	0	0	1465	48	T2	0	N0	0	0	0	Stage IIA	0	1	1		0	0
TCGA-E9-A1N6-01A-11R-A144-07	1990.5	0	1	2010	52	0	0	0	0	T2	0	N1	1	1	0	Stage IIB	0	1	1	1	1	0
TCGA-AN-A0FX-01A-11R-A034-07	2349.92	1	1	2010	52	0	0	10	0	T2	0	N0	0	0	0	Stage IIA	0	0	0	1	1	0
TCGA-BH-A0HU-01A-11R-A034-07	2423.26	1	-1	2009	52	0	0	392	13	T1c	1	N0 (i-)	0	0	0	Stage IA	0	1	1	0	0	0
TCGA-E2-A1L8-01A-11R-A13Q-07	2455.44	1		2008	52	0	0	1015	33	T2	0	N1a	1	1	0	Stage IIB	0	1	1		0	0
TCGA-EW-A2FW-01A-11R-A17B-07	2734.28	1	1	2011	52	0	0	191	6	T2	0	N0 (i-)	0	0		Stage IIA	0	1	1	0	0	0
TCGA-C8-A130-01A-31R-A115-07	2915.75	1	-1	2010	52	0	0	4	0	T3	0	N2	1	1	0	Stage IIIA	1	1	1
TCGA-E9-A243-01A-21R-A169-07	3034.31	1	-1	2011	52	0	0	43	1	T2	0	N0 (i-)	0	0	0	Stage IIA	0
TCGA-BH-A0E1-01A-11R-A056-07	3046.28	1	-1	2009	52	0	0	477	15	T2	0	N1	1	1	0	Stage IIB	0	1	1		0	0
TCGA-A7-A4SD-01A-11R-A266-07	3097.51	1	1	2012	52	0	0	168	5	T2	0	N0	0	0	0	Stage IIA	0	0	0		0	1
TCGA-EW-A1PH-01A-11R-A14M-07	3697.05	1	1	2010	52	0	0	140	4	T1c	1	N1a	1	1	0	Stage IIA	0	0	0	0	0	1
TCGA-A8-A08B-01A-11R-A00Z-07	4005.3	1	-1	2008	52	0	0	702	23	T2	0	N0	0	0	0	Stage IIA	0	1	0	1	1	0
TCGA-BH-A0AV-01A-31R-A115-07	4140.03	1		2008	52	0	0	1180	39	T1c	1	N0	0	0	0	Stage I	0	0	0		0	1
TCGA-C8-A134-01A-11R-A115-07	4433.5	1	-1	2010	52	0	0	14	0	T2	0	N0	0	0	0	Stage IIA	0	0	0
TCGA-A1-A0SI-01A-11R-A144-07	4770.16	1		2007	52	0	0	635	21	T2	0	N1a	1	1	0	Stage IIB	0	1	1	0	0	0
TCGA-A8-A08R-01A-11R-A034-07	7320.38	1	1	2008	52	0	0	30	1	T2	0	N1a	1	1	0	Stage IIB	0	0	0	0	0	1
TCGA-D8-A13Y-01A-11R-A115-07	8130.43	1	1	2010	52	0	0	264	8	T1c	1	N0	0	0	0	Stage IA	0	1	1	0	0	0
TCGA-EW-A1PG-01A-11R-A144-07	937.569	0	1	2008	53	0	0	876	29	T2	0	N1a	1	1		Stage IIB	0	1	1		0	0
TCGA-A2-A0EW-01A-21R-A115-07	1011.69	0	1	2008	53	0	0	770	25	T1b	1	N3a	1	1	0	Stage IIIC	1	1	1	0	0	0
TCGA-EW-A1IZ-01A-11R-A13Q-07	1027.9	0	1	2010	53	0	0	260	8	T2	0	N2a	1	1		Stage IIIA	1	1	1	0	0	0
TCGA-D8-A73X-01A-11R-A32P-07	1211.47	0	1	2013	53	0	0	368	12	T2	0	N0	0	0	0	Stage IIA	0	1	1	0	0	0
TCGA-GM-A2DD-01A-11R-A180-07	1345.47	0		2007	53	0	0	1309	43	T1c	1	N0 (i-)	0	0	0	Stage I	0	0	0		0	1
TCGA-E2-A1BD-01A-11R-A12P-07	1367.64	0	1	2010	53	0	0	317	10	T2	0	N0	0	0	0	Stage IIA	0	1	1		0	0
TCGA-A2-A0YH-01A-11R-A109-07	1414.81	0	1	2009	53	0	0	379	12	T2	0	N2a	1	1	0	Stage IIIA	1	1	1	0	0	0
TCGA-C8-A1HK-01A-21R-A13Q-07	1570.39	0	-1	2010	53	0	0	7	0	T2	0	N1	1	1	0	Stage IIB	0	0	0	1	1	0
TCGA-AO-A0JE-01A-11R-A056-07	1593.1	0	1	2005	53	0	0	1966	65	T2	0	N2a	1	1	0	Stage IIIA	1	0	0	1	1	0
TCGA-A2-A04Y-01A-21R-A034-07	1609.9	0	1	2008	53	0	0	764	25	T2	0	N1mi	1	1	0	Stage IIB	0	1	1	0	0	0
TCGA-AR-A0TT-01A-31R-A084-07	1647.63	0	-1	2006	53	0	0	1730	57	T2	0	N2	1	1	0	Stage IIIA	1	1	0	0	0	0
TCGA-D8-A1XW-01A-11R-A14M-07	1675.72	0	1	2011	53	0	0	118	3	T2	0	N0	0	0	0	Stage IIA	0	0	1	0	0	0
TCGA-BH-A0E9-01B-11R-A115-07	1794.57	0	1	2006	53	0	0	1405	46	T2	0	N1a	1	1	0	Stage IIB	0	1	1	0	0	0
TCGA-BH-AB28-01A-31R-A41B-07	1802.31	0		2013	53	0	0	185	6	T3	0	N1a	1	1	0	Stage IIIA	1	1	1	0	0	0
TCGA-A7-A2KD-01A-31R-A21T-07	2326.02	1		2011	53	0	0	182	6	T2	0	N2a	1	1		Stage IIIA	1	1	1	1	1	0
TCGA-BH-A18I-01A-11R-A12D-07	2451.72	1	1	2010	53	0	0	220	7	T1c	1	N1a	1	1	0	Stage IIA	0	1	1	1	1	0
TCGA-C8-A8HQ-01A-11R-A36F-07	2541.72	1	1	2013	53	0	0	9	0	T2	0	N1	1	1	0	Stage IIB	0	1	1	0	0	0
TCGA-D8-A27T-01A-11R-A16F-07	2571.6	1	1	2011	53	0	0	136	4	T2	0	N3a	1	1	0	Stage IIIC	1	1	1	0	0	0
TCGA-A8-A08I-01A-11R-A00Z-07	2880.26	1	1	2009	53	0	0	365	12	T2	0	N0	0	0	0	Stage IIA	0	1	1	0	0	0
TCGA-E2-A14V-01A-11R-A12D-07	3052.33	1	1	2008	53	0	0	748	24	T2	0	N1	1	1	0	Stage IIB	0	1	1	1	1	0
TCGA-GM-A2DF-01A-11R-A180-07	3139.06	1	1	2007	53	0	0	1299	43	T1c	1	N1a	1	1	0	Stage IIA	0	0	0	0	0	1
TCGA-BH-A0B3-01A-11R-A056-07	5228.14	1	1	2007	53	0	0	1203	40	T2	0	N1a	1	1	0	Stage IIB	0	0	0	0	0	1
TCGA-C8-A1HJ-01A-11R-A13Q-07	9785.01	1	-1	2010	53	0	0	5	0	T2	0	N0	0	0	0	Stage IIA	0	0	0	0	0	1
TCGA-D8-A3Z5-01A-41R-A24H-07	595.853	0	1	2011	54	0	0	441	14	T2	0	N3a	1	1	0	Stage IIIC	1	1	1	0	0	0
TCGA-BH-A8G0-01A-11R-A352-07	622.599	0	-1	2012	54	0	0	199	6	T2	0	N1a	1	1	0	Stage IIB	0	1	1	0	0	0
TCGA-BH-A0BM-01A-11R-A056-07	652.229	0	1	2007	54	0	0	1117	37	T2	0	N1a	1	1	0	Stage IIB	0	1	0	0	0	0
TCGA-A7-A4SF-01A-11R-A266-07	695.804	0	1	2012	54	0	0	369	12	T2	0	N0	0	0	0	Stage IIA	0	1	0	1	1	0
TCGA-BH-A0BO-01A-23R-A12D-07	764.133	0	-1	2007	54	0	0	1085	36	T1b	1	N0	0	0	0	Stage I	0	1	1	0	0	0
TCGA-BH-A0DV-01A-21R-A12P-07	795.774	0	-1	2007	54	0	0	1374	45	T2	0	N2a	1	1	0	Stage IIIA	1	1	1	0	0	0
TCGA-A1-A0SF-01A-11R-A144-07	817.822	0	-1	2006	54	0	0	1463	48	T2	0	N0	0	0	0	Stage IIA	0	1	1	0	0	0
TCGA-A2-A0CR-01A-11R-A22K-07	869.914	0	1	2004	54	0	0	2955	98	T3	0	N0	0	0	0	Stage IIB	0	1	1	0	0	0
TCGA-D8-A1JB-01A-11R-A13Q-07	871.224	0	1	2010	54	0	0	365	12	T2	0	N1a	1	1	0	Stage IIB	0	1	1		1	0
TCGA-A2-A0EO-01A-11R-A034-07	1007.17	0	-1	2003	54	0	0	2181	72	T1	1	N0 (i-)	0	0	0	Stage IA	0	1	1	0	0	0
TCGA-D8-A1JI-01A-11R-A13Q-07	1302.83	0	1	2010	54	0	0	21	0	T1c	1	N1a	1	1		Stage IIA	0	1	1	0	0	0
TCGA-BH-A0HX-01A-21R-A056-07	1522.83	0	1	2008	54	0	0	829	27	T2	0	N1a	1	1	0	Stage IIB	0	1	1	0	0	0
TCGA-E2-A107-01A-11R-A10J-07	1606.61	0	1	2008	54	0	0	763	25	T3	0	N2a	1	1	0	Stage IIIA	1	1	0		0	0
TCGA-GM-A2DO-01A-11R-A18M-07	1660.43	0	1	2006	54	0	0	1623	54	T1c	1	N0 (i-)	0	0	0	Stage I	0	1	1	0	0	0
TCGA-AO-A03P-01A-11R-A00Z-07	1663.58	0	1	2003	54	0	0	2576	85	T2	0	N1	1	1	0	Stage IIB	0	1	1	0	0	0
TCGA-AR-A5QP-01A-11R-A28M-07	1811.15	0	1	2011	54	0	0	439	14	T2	0	N1	1	1	0	Stage IIB	0	1	1
TCGA-AN-A0XT-01A-11R-A109-07	1817.08	0	1	2010	54	0	0	10	0	T2	0	N2	1	1	0	Stage IIIA	1	1	0	0	0	0
TCGA-A8-A0AB-01A-11R-A034-07	1868.06	0	1	2009	54	0	0	518	17	T2	0	N0	0	0	0	Stage IIA	0	1	1	1	1	0
TCGA-AR-A1AS-01A-11R-A12P-07	1955.43	0	1	2007	54	0	0	1150	38	T2	0	N1	1	1	0	Stage IIB	0	1	1	0	0	0
TCGA-A7-A4SE-01A-11R-A266-07	2192.6	1	1	2011	54	0	0	371	12	T2	0	N0	0	0	0	Stage IIA	0	0	0	0	0	1
TCGA-C8-A138-01A-11R-A115-07	2270.45	1	1	2010	54	0	0	7	0	T2	0	N2	1	1	0	Stage IIIA	1	1	0
TCGA-LD-A7W6-01A-81R-A352-07	2437.48	1	1	2013	54	0	0	140	4	T2	0	N1a	1	1	0	Stage IIB	0	1	1	0	0	0
TCGA-AR-A0U4-01A-11R-A109-07	2726.55	1	-1	2006	54	0	0	1684	56	T2	0	N0	0	0	0	Stage IIA	0	0	0	0	0	1
TCGA-E9-A244-01A-11R-A169-07	3131.66	1	1	2011	54	0	0	21	0	T2	0	N0 (i-)	0	0	0	Stage IIA	0
TCGA-AR-A24N-01A-11R-A169-07	3274.51	1	-1	2005	54	0	0	2074	69	T1	1	N0	0	0	0	Stage I	0	1	1		0	0
TCGA-PL-A8LV-01A-21R-A41B-07	3337.91	1		2013	54	0	0	-7	-1	T4	0	N0	0	0	0	Stage IIIB	1
TCGA-AO-A0JJ-01A-11R-A056-07	3352.9	1	1	2006	54	0	0	1512	50	T2	0	N1a	1	1	0	Stage IIB	0	1	1	0	0	0
TCGA-D8-A1JJ-01A-31R-A14M-07	3364.95	1	1	2010	54	0	0	274	9	T2	0	N0	0	0	0	Stage IIA	0	1	1	0	0	0
TCGA-AR-A0TY-01A-12R-A115-07	3911.64	1	1	2004	54	0	1	1699	56	T2	0	N0	0	0	0	Stage IIA	0	1	0	0	0	0
TCGA-AN-A0XU-01A-11R-A109-07	4617.51	1	1	2010	54	0	0	10	0	T2	0	N0	0	0	0	Stage IIA	0	0	0	0	0	1
TCGA-A1-A0SK-01A-12R-A084-07	5625.91	1		2007	54	0	1	967	32	T2	0	N0 (i-)	0	0	0	Stage IIA	0	0	0	0	0	1
TCGA-WT-AB41-01A-11R-A41B-07	585.173	0		2010	55	0	0	1550	51	T2	0	N1mi	1	1		Stage IIB	0	1	1
TCGA-AR-A24W-01A-11R-A169-07	929.857	0	1	2006	55	0	0	1550	51	T2	0	N1	1	1	0	Stage IIB	0	1	1	0	0	0
TCGA-AR-A2LH-01A-31R-A18M-07	1149.32	0	1	2007	55	0	1	616	20	T3	0	N3	1	1	0	Stage III	1	0	0		0	1
TCGA-BH-A0BS-01A-11R-A12P-07	1163.3	0	1	2007	55	0	0	1641	54	T3	0	N1c	1	1	0	Stage IIIA	1	1	1		0	0
TCGA-LL-A73Z-01A-11R-A32P-07	1178.6	0	1	2013	55	0	0	137	4	T1c	1	NX			1	Stage IV	1	1	1		0	0
TCGA-B6-A408-01A-12R-A24H-07	1250.44	0		2008	55	0	0	1519	50	T2	0	N3a	1	1	0	Stage IIIC	1	1	1		0	0
TCGA-AN-A0FS-01A-11R-A034-07	1448.77	0	-1	2010	55	0	0	191	6	T1c	1	N0	0	0	0	Stage IB	0	1	0	1	1	0
TCGA-D8-A27W-01A-11R-A16F-07	1521.23	0	1	2011	55	0	0	15	0	T4b	0	N0	0	0	0	Stage IIIB	1	1	1		1	0
TCGA-AQ-A7U7-01A-22R-A352-07	1531.57	0		2013	55	0	0	304	10	T2	0	N2a	1	1	0	Stage IIIA	1	1	1	0	0	0
TCGA-BH-A0HB-01A-11R-A056-07	1551.41	0	1	2008	55	0	0	806	26	T1c	1	N0 (i-)	0	0	0	Stage IA	0	1	1		0	0
TCGA-E2-A14X-01A-11R-A115-07	1832.12	0	1	2009	55	0	0	692	23	T2	0	N2	1	1	0	Stage IIIA	1	0	0	0	0	1
TCGA-AN-A0FY-01A-11R-A034-07	1945.3	0	1	2010	55	0	0	10	0	T1c	1	N0	0	0	0	Stage IB	0	1	1	0	0	0
TCGA-3C-AAAU-01A-11R-A41B-07	2072.43	0	-1	2004	55	0	0	3767	125	TX		NX				Stage X		1	1	0	0	0
TCGA-A2-A0T1-01A-21R-A084-07	2157.71	0	1	2009	55	0	0	323	10	T3	0	N3	1	1	0	Stage IIIC	1	0	0	1	1	0
TCGA-A2-A3KC-01A-11R-A213-07	2167.58	0	-1	2011	55	0	0	363	12	T2	0	N1a	1	1	0	Stage IIB	0	1	1		0	0
TCGA-C8-A12P-01A-11R-A115-07	2215.13	1	1	2010	55	0	0	0	0	T2	0	N1	1	1	0	Stage IIB	0	0	0	1	1	0
TCGA-A7-A26F-01A-21R-A169-07	2262.85	1		2010	55	0	0	257	8	T1	1	N0	0	0	0	Stage IA	0	0	0		0	1
TCGA-C8-A12V-01A-11R-A115-07	2353.2	1	1	2010	55	0	0	0	0	T2	0	N0	0	0	0	Stage IIA	0	0	0	0	0	1
TCGA-AN-A0AR-01A-11R-A00Z-07	2443.78	1	-1	2010	55	0	0	10	0	T2	0	N0	0	0	0	Stage IIA	0	0	0	0	0	1
TCGA-EW-A1P0-01A-11R-A144-07	2641.64	1	1	2008	55	0	0	1121	37	T2	0	N1b	1	1		Stage IIB	0	1	0	0	0	0
TCGA-AN-A0XR-01A-11R-A109-07	3130.22	1	1	2010	55	0	0	10	0	T2	0	N2	1	1	0	Stage IIIA	1	1	0	0	0	0
TCGA-D8-A1XK-01A-21R-A14M-07	7017.85	1	1	2010	55	0	0	326	10	T2	0	N1a	1	1		Stage IIB	0	0	0	0	0	1
TCGA-BH-A0BT-01A-11R-A12P-07	783.823	0		2007	56	0	0	1386	46	T1c	1	N1mi	1	1	0	Stage IIA	0	1	1	0	0	0
TCGA-BH-A0HL-01A-11R-A10U-07	825.278	0	1	2009	56	0	0	72	2	T2	0	N1a	1	1	0	Stage IIB	0	1	1		0	0
TCGA-D8-A3Z6-01A-11R-A239-07	870.249	0	1	2011	56	0	0	185	6	T3	0	N3a	1	1	0	Stage IIIC	1	1	1	0	0	0
TCGA-BH-A0HQ-01A-11R-A034-07	898.397	0	1	2007	56	0	0	1121	37	T2	0	N0 (i+)	0	1	0	Stage IIA	0	1	1	0	0	0
TCGA-A2-A0EP-01A-52R-A22U-07	1048.17	0	1	2004	56	0	0	3021	100	T1	1	N0 (i+)	0	1	0	Stage I	0	1	0	0	0	0
TCGA-D8-A1JH-01A-11R-A13Q-07	1253.3	0	1	2010	56	0	0	284	9	T1c	1	N0	0	0	0	Stage IA	0	1	1	0	0	0
TCGA-AO-A0JI-01A-21R-A056-07	1336.24	0	1	2007	56	0	0	1172	39	T1c	1	N1	1	1	0	Stage IIA	0	1	0	0	0	0
TCGA-EW-A1PE-01A-11R-A144-07	1348.8	0	1	2011	56	0	0	107	3	T1c	1	N1a	1	1	0	Stage IIA	0	1	1	0	0	0
TCGA-A7-A0DB-01A-11R-A00Z-07	1537.31	0	1	2009	56	0	0	141	4	T2	0	N0 (i-)	0	0	0	Stage IIA	0	1	1	0	0	0
TCGA-EW-A1OZ-01A-11R-A144-07	1577.03	0	1	2008	56	0	0	941	31	T2	0	N0 (i-)	0	0	0	Stage IIA	0	1	0		1	0
TCGA-A7-A4SB-01A-21R-A266-07	1577.08	0	1	2012	56	0	0	200	6	T3	0	N1mi	1	1	0	Stage IIIA	1	1	1	0	0	0
TCGA-AC-A7VC-01A-11R-A352-07	1617.78	0	1	2013	56	0	0	1	0	T3	0	N0	0	0		Stage IIB	0	0	0	0	0	1
TCGA-BH-A0B0-01A-21R-A115-07	1646.01	0	-1	2006	56	0	0	1428	47	T1c	1	N0	0	0	0	Stage I	0	1	1	0	0	0
TCGA-EW-A1OV-01A-11R-A144-07	1681.96	0	1	2009	56	0	0	523	17	T2	0	N1mi	1	1		Stage IIB	0	0	0	0	0	1
TCGA-E9-A22E-01A-11R-A157-07	1721.08	0	1	2011	56	0	0	0	0	T2	0	N2	1	1	0	Stage IIIA	1	1	1	1	1	0
TCGA-LL-A442-01A-11R-A24H-07	1746.49	0		2012	56	0	0	109	3	T2	0	N0 (i-)	0	0		Stage IIA	0	1	1		0	0
TCGA-E2-A152-01A-11R-A12D-07	1751.66	0	1	2009	56	0	0	588	19	T1c	1	N0	0	0	0	Stage I	0	1	0	1	1	0
TCGA-A1-A0SE-01A-11R-A084-07	1783.3	0	-1	2005	56	0	0	1321	44	T1c	1	N0 (i-)	0	0	0	Stage I	0	1	1	0	0	0
TCGA-D8-A1XO-01A-11R-A14M-07	1812.78	0	1	2010	56	0	0	242	8	T2	0	N1a	1	1	0	Stage IIB	0	1	1	0	0	0
TCGA-A2-A0YT-01A-11R-A109-07	1943.77	0	1	2008	56	0	1	723	24	T4b	0	N2a	1	1	0	Stage IIIB	1	1	0		0	0
TCGA-E9-A1RC-01A-11R-A157-07	1951.64	0	1	2007	56	0	0	1224	40	T4b	0	N3	1	1	0	Stage IIIC	1
TCGA-AN-A0AM-01A-11R-A034-07	2057.2	0	1	2010	56	0	0	5	0	T2	0	N0	0	0	0	Stage IIA	0	1	0	0	0	0
TCGA-BH-A0BF-01A-21R-A12P-07	2117.69	0	1	2009	56	0	0	782	26	T2	0	N1mi	1	1	0	Stage IIB	0	1	1	0	0	0
TCGA-BH-A0AW-01A-11R-A056-07	2238.26	1	1	2008	56	0	0	622	20	T1c	1	N1a	1	1	0	Stage IIA	0	1	0	1	1	0
TCGA-C8-A132-01A-31R-A115-07	2509.65	1	1	2010	56	0	0	13	0	T2	0	N1	1	1	0	Stage IIB	0	1	1
TCGA-D8-A1XU-01A-11R-A14M-07	2607.62	1	1	2010	56	0	0	150	5	T1c	1	N0	0	0	0	Stage IA	0	1	1	0	0	0
TCGA-D8-A1XR-01A-11R-A14M-07	2811.68	1	1	2010	56	0	0	168	5	T2	0	N1a	1	1	0	Stage IIB	0	1	1	0	0	0
TCGA-AN-A0G0-01A-11R-A034-07	3519.02	1	1	2010	56	0	0	16	0	T2	0	N0	0	0	0	Stage IIA	0	0	0	0	0	1
TCGA-C8-A1HN-01A-11R-A137-07	3578.66	1	1	2010	56	0	0	2	0	T2	0	N0	0	0	0	Stage IIA	0	1	1
TCGA-BH-A18Q-01A-12R-A12D-07	4390.55	1		2001	56	0	1	1692	56	T2	0	N1b	1	1	0	Stage IIB	0	0	0	1	1	0
TCGA-HN-A2NL-01A-11R-A18M-07	5518.86	1	1	2014	56	0	0	79	2	T2	0	N0	0	0	0	Stage IIA	0	0	0	0	0	1
TCGA-C8-A275-01A-21R-A16F-07	7060.31	1	1	2010	56	0	0	1	0	T1	1	N1	1	1	0	Stage IIA	0
TCGA-GM-A2DM-01A-11R-A180-07	723.117	0	1	2004	57	0	0	2331	77	T2	0	N0 (i-)	0	0	0	Stage IIA	0	1	1	0	0	0
TCGA-OL-A5RZ-01A-11R-A28M-07	1123.27	0	1	2012	57	0	0	313	10	T1b	1	N0	0	0		Stage IA	0	1	0		1	0
TCGA-A8-A0A7-01A-11R-A00Z-07	1221.04	0	1	2009	57	0	0	30	1	T2	0	N1a	1	1	0	Stage IIB	0	0	0	1	1	0
TCGA-GM-A2DC-01A-11R-A18M-07	1222.81	0	1	2006	57	0	0	1628	54	T1c	1	N1a	1	1	0	Stage IIA	0	1	1		0	0
TCGA-E2-A1IJ-01A-11R-A144-07	1353.89	0	1	2009	57	0	0	725	24	T1c	1	N0	0	0	0	Stage I	0	1	1		0	0
TCGA-D8-A146-01A-31R-A115-07	1367.03	0		2010	57	0	0	344	11	T2	0	N0	0	0		Stage IIA	0	1	1	0	0	0
TCGA-A2-A3Y0-01A-11R-A239-07	1757.68	0	1	2010	57	0	0	859	28	T2	0	N1a	1	1	0	Stage IIB	0	1	0	0	0	0
TCGA-D8-A1XM-01A-21R-A14M-07	1804.06	0	1	2010	57	0	0	218	7	T1c	1	N0	0	0	0	Stage IA	0	1	1	0	0	0
TCGA-A8-A09N-01A-11R-A00Z-07	2367.88	1	1	2006	57	0	0	31	1	T2	0	N3a	1	1	0	Stage IIIC	1	1	1	1	1	0
TCGA-AR-A24Z-01A-11R-A169-07	2873.76	1	1	2006	57	0	0	1574	52	T2	0	N0	0	0	0	Stage IIA	0	1	1	0	0	0
TCGA-A7-A0CE-01A-11R-A00Z-07	2973.47	1		2009	57	0	0	254	8	T2	0	N0 (i-)	0	0	0	Stage IIA	0	0	0		0	1
TCGA-AO-A03R-01A-21R-A034-07	3545.32	1	1	2005	57	0	0	1707	56	T2	0	N1a	1	1	0	Stage IIB	0	1	1	0	0	0
TCGA-A7-A0CJ-01A-21R-A00Z-07	3803.76	1	1	2010	57	0	0	189	6	T2	0	N0 (i-)	0	0	0	Stage IIA	0	1	1	0	0	0
TCGA-E2-A1LI-01A-12R-A157-07	4208.23	1	1	2003	57	0	0	2750	91	T2	0	N1	1	1	0	Stage IIB	0	0	0		0	1
TCGA-A8-A07C-01A-11R-A034-07	7411.17	1	1	2008	57	0	0	580	19	T2	0	N0	0	0	0	Stage IIA	0	0	0	0	0	1
TCGA-BH-A8FZ-01A-11R-A352-07	632.154	0	1	2012	58	0	0	144	4	T1b	1	N0	0	0	0	Stage IA	0	1	1
TCGA-GM-A2DK-01A-21R-A180-07	957.236	0	1	2005	58	0	0	1896	63	T1c	1	N0 (i-)	0	0	0	Stage I	0	1	0	0	0	0
TCGA-C8-A12N-01A-11R-A115-07	993.651	0	1	2010	58	0	0	0	0	T2	0	N0 (i-)	0	0	0	Stage IIA	0	1	1	0	0	0
TCGA-D8-A27I-01A-11R-A16F-07	1002.04	0	1	2010	58	0	0	186	6	T1c	1	N2a	1	1	0	Stage IIIA	1	1	1	0	0	0
TCGA-A8-A09B-01A-11R-A00Z-07	1342.01	0	1	2009	58	0	0	365	12	T4b	0	N1a	1	1	0	Stage IIIB	1	1	1	0	0	0
TCGA-C8-A26X-01A-31R-A16F-07	1801.1	0	1	2010	58	0	0	11	0	T1	1	N1	1	1	0	Stage IIA	0	0	0	0	0	1
TCGA-AR-A250-01A-31R-A169-07	1834.44	0	1	2006	58	0	0	1708	56	T2	0	N0	0	0	0	Stage IIA	0	1	0		1	0
TCGA-E9-A1R0-01A-22R-A16F-07	1853.91	0	1	2011	58	0	0	0	0	T1c	1	N1	1	1	0	Stage IIA	0
TCGA-GM-A2DN-01A-11R-A180-07	1890.09	0	1	2004	58	0	0	2352	78	T2	0	N0 (i-)	0	0	0	Stage IIA	0	1	1	0	0	0
TCGA-AN-A0FV-01A-11R-A00Z-07	1900.34	0	1	2010	58	0	0	10	0	T2	0	N0	0	0	0	Stage IIA	0	0	0	1	1	0
TCGA-E9-A1N9-01A-11R-A14D-07	2000.55	0	1	2011	58	0	0	0	0	T2	0	N0	0	0	0	Stage IIA	0	0	1	1	1	0
TCGA-E9-A1NA-01A-11R-A144-07	2104.82	0	1	2011	58	0	0	0	0	T2	0	N0	0	0	0	Stage IIA	0	1	1	1	1	0
TCGA-EW-A1OW-01A-21R-A144-07	2244.51	1	1	2009	58	0	0	464	15	T2	0	N0	0	0		Stage IIA	0	0	0	0	0	1
TCGA-E9-A228-01A-31R-A157-07	2501.76	1	1	2011	58	0	0	0	0	T2	0	N1	1	1	0	Stage IIB	0
TCGA-E2-A15K-01A-11R-A12P-07	2524.16	1	1	2010	58	0	0	34	1	T2	0	N1a	1	1	0	Stage IIA	0	1	1		0	0
TCGA-EW-A1P8-01A-11R-A144-07	2777.06	1	1	2010	58	0	1	239	7	T2	0	N3b	1	1	0	Stage IIIC	1	0	0	0	0	1
TCGA-GI-A2C9-01A-11R-A21T-07	2787.11	1	1	2003	58	0	0	711	23	T3	0	N0	0	0		Stage IIB	0	0	0	0	0	1
TCGA-E2-A155-01A-11R-A12D-07	2825.07	1	1	2009	58	0	0	553	18	T2	0	N1a	1	1	0	Stage IIB	0	1	0	0	0	0
TCGA-BH-A0W3-01A-11R-A109-07	2882.74	1		2010	58	0	0	180	6	T1c	1	N1a	1	1	0	Stage IIA	0	1	1		0	0
TCGA-A2-A0ET-01A-31R-A034-07	3176.33	1	1	2008	58	0	0	807	26	T2	0	N2a	1	1	0	Stage IIIA	1	1	1		0	0
TCGA-A8-A07L-01A-11R-A00Z-07	3212.13	1	1	2009	58	0	0	518	17	T3	0	N1a	1	1	0	Stage IIIA	1	1	1	0	0	0
TCGA-AC-A2QH-01A-11R-A18M-07	3590.27	1	1	2011	58	0	0	31	1	T3	0	N0	0	0		Stage IIB	0	0	0	0	0	1
TCGA-A8-A082-01A-11R-A00Z-07	3596.8	1	1	2008	58	0	0	549	18	T2	0	N1a	1	1	0	Stage IIB	0	1	1	0	0	0
TCGA-AN-A04D-01A-21R-A034-07	4542.76	1	1	2008	58	0	0	52	1	T2	0	N1	1	1	0	Stage IIB	0	0	0	0	0	1
TCGA-C8-A26W-01A-11R-A16F-07	4826.05	1	1	2010	58	0	0	7	0	T2	0	N1	1	1	0	Stage IIB	0	1	1
TCGA-GM-A2DH-01A-11R-A180-07	6119.43	1	1	2007	58	0	0	1286	42	T1c	1	N0 (i+)	0	1	0	Stage I	0	0	0	0	0	1
TCGA-OL-A66N-01A-12R-A31O-07	645.086	0	1	2011	59	0	0	413	13	T3	0	N3	1	1		Stage IIIC	1	1	0		0	0
TCGA-C8-A26Z-01A-11R-A16F-07	1127.58	0	1	2010	59	0	0	4	0	T2	0	N0	0	0	0	Stage IIA	0	1	1	0	0	0
TCGA-E9-A247-01A-11R-A169-07	1140.73	0	1	2011	59	0	0	13	0	T1c	1	N0 (i-)	0	0	0	Stage IA	0
TCGA-A1-A0SD-01A-11R-A115-07	1197.92	0		2005	59	0	0	437	14	T2	0	N0	0	0	0	Stage IIA	0	1	1	0	0	0
TCGA-EW-A2FR-01A-11R-A21T-07	1304.44	0	1	2008	59	0	0	1120	37	T1b	1	N3a	1	1		Stage IIIC	1	0	0		1	0
TCGA-BH-A0BZ-01A-31R-A12P-07	1325.99	0	1	2007	59	0	0	1492	49	T3	0	N1a	1	1	0	Stage IIIA	1	1	1	0	0	0
TCGA-EW-A1P7-01A-21R-A144-07	1360.1	0	1	2009	59	0	0	635	21	T2	0	N0 (i-)	0	0	0	Stage IIA	0	0	0		0	1
TCGA-OK-A5Q2-01A-11R-A27Q-07	1394.83	0		2012	59	0	0	64	2	T2	0	N1a	1	1		Stage II	0	1	1	0	0	0
TCGA-AR-A2LQ-01A-22R-A18M-07	1421.85	0	1	2010	59	0	0	516	17	T3	0	N0	0	0	0	Stage IIB	0	1	1	0	0	0
TCGA-A8-A086-01A-11R-A00Z-07	1431.36	0	1	2009	59	0	0	396	13	T1c	1	N1a	1	1	0	Stage IIA	0	1	1	0	0	0
TCGA-A2-A0YC-01A-11R-A109-07	1454.44	0	1	2008	59	0	0	644	21	T2	0	N1mi	1	1	0	Stage IIB	0	1	1		0	0
TCGA-EW-A1PA-01A-11R-A144-07	1610.5	0	1	2010	59	0	0	267	8	T2	0	N1a	1	1	0	Stage IIB	0	1	1	0	0	0
TCGA-A2-A4S3-01A-21R-A266-07	1625.07	0	1	2012	59	0	0	104	3	T2	0	N1a	1	1	0	Stage IIB	0	1	1	0	0	0
TCGA-C8-A8HP-01A-11R-A36F-07	1644.84	0	1	2013	59	0	0	8	0	T2	0	N2	1	1	0	Stage IIIA	1	0	0	1	1	0
TCGA-AO-A0JL-01A-11R-A056-07	1692.15	0	1	2006	59	0	0	1319	43	T2	0	N2a	1	1	0	Stage IIIA	1	0	0	0	0	1
TCGA-BH-A0RX-01A-21R-A084-07	1877.91	0	1	2010	59	0	0	170	5	T2	0	N0 (i-)	0	0	0	Stage IIA	0	0	0	0	0	1
TCGA-EW-A1J5-01A-11R-A13Q-07	1886.58	0	1	2010	59	0	0	227	7	T3	0	N0 (i-)	0	0	0	Stage IIB	0	1	1	0	0	0
TCGA-AN-A0XO-01A-11R-A109-07	1997.02	0	1	2010	59	0	0	375	12	T2	0	N2	1	1	0	Stage IIIA	1	1	0	0	0	0
TCGA-AO-A03N-01B-11R-A10J-07	2254.88	1	1	2006	59	0	0	1645	54	T2	0	N1a	1	1	0	Stage IIB	0	1	1	0	0	0
TCGA-BH-A0BR-01A-21R-A115-07	2280.69	1	1	2007	59	0	0	1633	54	T1c	1	N0	0	0	0	Stage I	0	1	1	0	0	0
TCGA-E2-A1LH-01A-11R-A14D-07	2285.16	1	1	2002	59	0	0	2876	95	T1c	1	N0	0	0	0	Stage I	0	0	0	0	0	1
TCGA-E2-A1LA-01A-11R-A144-07	2371.61	1	1	2009	59	0	0	463	15	T1c	1	N1a	1	1	0	Stage IIA	0	1	1		0	0
TCGA-D8-A27M-01A-11R-A16F-07	2377.46	1	1	2011	59	0	0	145	4	T1c	1	N0	0	0	0	Stage IA	0	0	0	0	0	1
TCGA-D8-A1JC-01A-11R-A13Q-07	2677.31	1	1	2010	59	0	0	178	5	T2	0	N2a	1	1	0	Stage IIIA	1	1	1	0	0	0
TCGA-AN-A0FJ-01A-11R-A00Z-07	2746.1	1	-1	2010	59	0	0	242	8	T2	0	N2	1	1	1	Stage IV	1	1	0	1	1	0
TCGA-C8-A1HE-01A-11R-A13Q-07	3017.21	1	1	2010	59	0	0	0	0	T2	0	N0	0	0	0	Stage IIA	0	1	1
TCGA-A2-A0T0-01A-22R-A084-07	3221.43	1	1	2009	59	0	0	337	11	T2	0	N1	1	1	0	Stage IIB	0	0	0	0	0	1
TCGA-A8-A08F-01A-11R-A00Z-07	3343.32	1		2008	59	0	0	549	18	T2	0	N3a	1	1	0	Stage IIIC	1	1	1	0	0	0
TCGA-AR-A0U3-01A-11R-A109-07	3363.95	1	1	2004	59	0	0	2317	77	T2	0	N1	1	1	0	Stage IIB	0	1	1	0	0	0
TCGA-D8-A1JM-01A-11R-A13Q-07	3451.77	1	1	2010	59	0	0	238	7	T2	0	N1a	1	1	0	Stage IIB	0	1	0	0	0	0
TCGA-AO-A0JD-01A-11R-A056-07	3573.7	1	1	2005	59	0	0	1813	60	T3	0	N1a	1	1	0	Stage IIIA	1	1	1	0	0	0
TCGA-E9-A5FK-01A-11R-A27Q-07	614.293	0	1	2012	60	0	0	12	0	T2	0	N3	1	1	0	Stage IIIC	1	1	1	0	0	0
TCGA-A2-A0CP-01A-11R-A034-07	753.351	0	1	2003	60	0	0	2495	83	T1c	1	N0 (i-)	0	0	0	Stage IA	0	1	1		0	0
TCGA-E2-A1IU-01A-11R-A14D-07	967.729	0	1	2010	60	0	0	127	4	T1c	1	N0 (mol+)	0	1	0	Stage IA	0	1	1	0	0	0
TCGA-E2-A1IN-01A-11R-A13Q-07	1047.14	0	1	2010	60	0	0	392	13	T1c	1	N0	0	0	0	Stage I	0	1	1	0	0	0
TCGA-EW-A3E8-01B-11R-A24H-07	1052.05	0		2011	60	0	0	647	21	T3	0	N0	0	0		Stage IIB	0	1	0	0	0	0
TCGA-BH-A0DP-01A-21R-A056-07	1123.45	0	1	2009	60	0	0	476	15	T3	0	N0 (i-)	0	0	0	Stage IIB	0	1	1	0	0	0
TCGA-A2-A0CK-01A-11R-A22K-07	1604.04	0	1	2001	60	0	0	3820	127	T3	0	N2a	1	1	0	Stage IIIA	1	1	1	0	0	0
TCGA-E9-A1NF-01A-11R-A14D-07	1841.98	0	1	2011	60	0	0	0	0	T2	0	N0	0	0	0	Stage IIA	0	1	1	0	0	0
TCGA-C8-A3M7-01A-12R-A21T-07	1896	0	1	2010	60	0	0	1	0	T4b	0	N0	0	0	0	Stage IIIB	1	0	0	0	0	1
TCGA-D8-A1JA-01A-11R-A13Q-07	2102.93	0	1	2010	60	0	0	18	0	T4b	0	NX			0	[Not Available]		0	0	1	1	0
TCGA-EW-A6SC-01A-12R-A32P-07	2181.36	1		2012	60	0	0	952	31	T2	0	N0	0	0	0	Stage IIA	0	1	1	0	0	0
TCGA-AR-A1AL-01A-21R-A12P-07	2389.91	1	1	2006	60	0	0	1485	49	T3	0	N1	1	1	0	Stage IIIA	1	1	1	0	0	0
TCGA-A8-A06O-01A-11R-A00Z-07	2632.11	1	1	2009	60	0	0	396	13	T1c	1	N0	0	0	0	Stage I	0	1	1	0	0	0
TCGA-BH-A0BC-01A-22R-A084-07	2717.7	1	1	2007	60	0	0	974	32	T2	0	N3	1	1	0	Stage IIIC	1	1	1	0	0	0
TCGA-BH-A18P-01A-11R-A12D-07	2932.53	1		2003	60	0	1	921	30	T1	1	N0	0	0	0	Stage I	0	1	0	1	1	0
TCGA-BH-A0HY-01A-11R-A056-07	3770.22	1	1	2009	60	0	0	868	28	T1c	1	N0	0	0	0	Stage I	0	1	0	1	1	0
TCGA-BH-A202-01A-11R-A14M-07	3791.62	1	1	2011	60	0	0	22	0	T2	0	N0	0	0	0	Stage II	0	1	1	1	1	0
TCGA-A2-A0D0-01A-11R-A00Z-07	5911.86	1	1	2008	60	0	0	643	21	T2	0	N0 (i-)	0	0	0	Stage IIA	0	0	0	0	0	1
TCGA-Z7-A8R5-01A-42R-A41B-07	447.988	0		2005	61	0	0	3042	101	T3	0	N1a	1	1		Stage IIIA	1	1	1	0	0	0
TCGA-OL-A5DA-01A-11R-A27Q-07	729.666	0	1	2009	61	0	0	1357	45	T2	0	N0	0	0		Stage IIA	0	1	1		0	0
TCGA-LL-A740-01A-21R-A32P-07	759.79	0	1	2013	61	0	0	137	4	T1c	1	N0 (i-)	0	0		Stage IA	0	0	0		0	1
TCGA-A7-A13H-01A-11R-A22K-07	849.18	0	1	2010	61	0	0	551	18	T2	0	N1a	1	1		Stage IIB	0	1	1		0	0
TCGA-A1-A0SG-01A-11R-A144-07	905.049	0	1	2006	61	0	0	434	14	T2	0	N1a	1	1	0	Stage IIB	0	1	1	0	0	0
TCGA-LL-A440-01A-11R-A24H-07	969.747	0		2012	61	0	0	20	0	T1c	1	N0 (i-)	0	0		Stage IA	0	1	1		0	0
TCGA-E2-A156-01A-11R-A12D-07	1012.2	0	1	2009	61	0	0	481	16	T1c	1	N0	0	0	0	Stage I	0	1	1	0	0	0
TCGA-AO-A0J8-01A-21R-A034-07	1081.48	0	1	2009	61	0	0	277	9	T2	0	N0 (i+)	0	1	0	Stage IIA	0	1	1	0	0	0
TCGA-AN-A0FN-01A-11R-A034-07	1138.56	0	1	2010	61	0	0	218	7	T1c	1	N0	0	0	0	Stage IB	0	1	1	1	1	0
TCGA-AO-A0J6-01A-11R-A034-07	1247.72	0	1	2008	61	0	0	775	25	T2	0	N0 (i-)	0	0	0	Stage IIA	0	0	0	0	0	1
TCGA-A8-A093-01A-11R-A00Z-07	1280.76	0		2009	61	0	0	546	18	T2	0	N0	0	0	0	Stage IIA	0	1	1	0	0	0
TCGA-A8-A091-01A-11R-A00Z-07	1294.49	0		2008	61	0	0	580	19	T2	0	N0	0	0	0	Stage IIA	0	1	0	0	0	0
TCGA-A2-A0YK-01A-22R-A109-07	1363.94	0	1	2009	61	0	0	334	11	T2	0	N0 (i-)	0	0	0	Stage IIA	0	1	0	0	0	0
TCGA-E2-A15C-01A-31R-A12D-07	1377.6	0	1	2009	61	0	0	497	16	T1c	1	N0	0	0	0	Stage I	0	1	1		0	0
TCGA-AO-A0J9-01A-11R-A034-07	1398.05	0	1	2007	61	0	0	1256	41	T2	0	N3	1	1	0	Stage IIIC	1	1	1		0	0
TCGA-E9-A1QZ-01A-21R-A169-07	1590.17	0	1	2011	61	0	0	0	0	T2	0	N0	0	0	0	Stage IIA	0
TCGA-E9-A1NC-01A-21R-A26B-07	1594.56	0	1	2011	61	0	0	0	0	T2	0	N1	1	1	0	Stage IIB	0	0	1	1	1	0
TCGA-E2-A15P-01A-11R-A115-07	1678.48	0	1	2010	61	0	0	315	10	T1c	1	N0	0	0	0	Stage IA	0	1	1	0	0	0
TCGA-D8-A1Y3-01A-11R-A157-07	1843.94	0	1	2011	61	0	0	125	4	T2	0	N2a	1	1		Stage IIIA	1	1	1		0	0
TCGA-BH-A6R9-01A-21R-A32P-07	1860.75	0	1	2012	61	0	0	160	5	T2	0	N0	0	0	0	Stage IIA	0	0	1	0	0	0
TCGA-AQ-A04H-01B-11R-A10J-07	1892.74	0	1	2009	61	0	0	439	14	T2	0	N2a	1	1		Stage IIIA	1	1	1		1	0
TCGA-AN-A0XL-01A-11R-A10J-07	1947.69	0	1	2010	61	0	0	10	0	T2	0	N0	0	0	0	Stage IIA	0	1	1	0	0	0
TCGA-A2-A1FX-01A-11R-A13Q-07	2299.91	1	1	2008	61	0	0	935	31	T3	0	N2a	1	1	0	Stage IIIA	1	1	1		0	0
TCGA-E2-A1IE-01A-11R-A13Q-07	2316.79	1	1	2008	61	0	0	983	32	T2	0	N1	1	1	0	Stage IIB	0	1	1		0	0
TCGA-C8-A278-01A-11R-A169-07	2374.94	1	1	2010	61	0	0	1	0	T2	0	N2	1	1	0	Stage IIIA	1	0	0	1	1	0
TCGA-BH-A0C1-01B-11R-A12D-07	2385.95	1	1	2007	61	0	0	1339	44	T3	0	N2a	1	1	0	Stage IIIA	1	1	1	0	0	0
TCGA-LL-A8F5-01A-11R-A36F-07	2393.49	1	1	2013	61	0	0	189	6	T2	0	N0 (i-)	0	0		Stage IIA	0	1	0	0	0	0
TCGA-AR-A24S-01A-11R-A169-07	2448.72	1	1	2006	61	0	0	1888	62	T1	1	N0	0	0	0	Stage I	0	1	1	0	0	0
TCGA-EW-A3U0-01A-11R-A22K-07	2449.49	1	1	2011	61	0	0	229	7	T3	0	N1a	1	1	0	Stage IIIA	1	0	0	0	0	1
TCGA-EW-A1J3-01A-11R-A13Q-07	2618.51	1	1	2010	61	0	0	252	8	T1c	1	N0	0	0	0	Stage IA	0	1	1	1	1	0
TCGA-D8-A1XT-01A-11R-A14M-07	3642.57	1	1	2010	61	0	0	193	6	T1c	1	N1a	1	1	0	Stage IIA	0	0	0	1	1	0
TCGA-AO-A128-01A-11R-A10J-07	4470.83	1	1	2002	61	0	0	2877	95	T2	0	N0 (i-)	0	0	0	Stage IIA	0	0	0	0	0	1
TCGA-AN-A0FL-01A-11R-A034-07	679.871	0	1	2010	62	0	0	231	7	T2	0	N0	0	0	0	Stage IIA	0	0	0	1	1	0
TCGA-E9-A1RG-01A-11R-A14D-07	884.935	0	1	2011	62	0	0	35	1	T1c	1	N2	1	1	0	Stage IIIA	1
TCGA-BH-A0DE-01A-11R-A115-07	992.115	0	1	2007	62	0	0	948	31	T2	0	N0	0	0	0	Stage IIA	0	1	1	0	0	0
TCGA-AR-A5QM-01A-11R-A27Q-07	1105.83	0		2008	62	0	0	1440	48	T2	0	N0	0	0	0	Stage IIA	0	1	1
TCGA-D8-A1XB-01A-11R-A14D-07	1118.88	0	1	2010	62	0	0	201	6	T2	0	N1a	1	1	0	Stage IIB	0	1	1	0	0	0
TCGA-A7-A5ZV-01A-11R-A28M-07	1171.1	0	1	2012	62	0	0	210	7	T2	0	N0	0	0	0	Stage IIA	0	0	0		0	1
TCGA-E9-A1NG-01A-21R-A14M-07	1176.92	0	1	2011	62	0	0	0	0	T2	0	N0	0	0	0	Stage IIA	0	1	1	0	0	0
TCGA-A2-A4S2-01A-12R-A266-07	1178.87	0	1	2012	62	0	0	205	6	T3	0	N2	1	1	0	Stage IIIA	1	1	1	0	0	0
TCGA-A2-A0CQ-01A-21R-A034-07	1195.18	0	1	2003	62	0	0	2393	79	T1	1	N0 (i-)	0	0	0	Stage IA	0	1	1		0	0
TCGA-BH-A0AY-01A-21R-A00Z-07	1216.86	0	1	2008	62	0	0	777	25	T2	0	N0 (i-)	0	0	0	Stage IIA	0	1	1	0	0	0
TCGA-C8-A12X-01A-11R-A115-07	1221.58	0	1	2010	62	0	0	0	0	T2	0	N1	1	1	0	Stage IIB	0	1	1	0	0	0
TCGA-3C-AALJ-01A-31R-A41B-07	1250.23	0	1	2011	62	0	0	1228	40	T2	0	N1a	1	1	0	Stage IIB	0	1	1
TCGA-LL-A441-01A-11R-A24H-07	1263.95	0	1	2012	62	0	0	91	3	T1c	1	N0	0	0		Stage IA	0	0	0	0	0	1
TCGA-EW-A6SB-01A-12R-A32P-07	1337.09	0		2012	62	0	0	760	25	T2	0	N0	0	0	0	Stage II	0	0	0	0	0	1
TCGA-BH-A0DX-01A-11R-A115-07	1376.63	0	1	2007	62	0	0	1442	48	T1b	1	N0	0	0	0	Stage I	0	1	1	0	0	0
TCGA-A2-A0YI-01A-31R-A10J-07	1395.05	0	1	2009	62	0	0	358	11	T1c	1	N0 (i+)	0	1	0	Stage I	0	1	1	0	0	0
TCGA-A7-A3J0-01A-11R-A213-07	1466.31	0	1	2011	62	0	0	76	2	T2	0	N0	0	0	0	Stage IIA	0	1	1	0	0	0
TCGA-A2-A0EY-01A-11R-A034-07	1547.02	0	1	2009	62	0	0	485	16	T2	0	N1a	1	1	0	Stage IIB	0	1	0	1	1	0
TCGA-A2-A3XS-01A-11R-A22U-07	1557.45	0	1	2003	62	0	1	1032	34	T1	1	N2a	1	1	0	Stage IIIA	1	0	0		0	1
TCGA-A8-A09X-01A-11R-A00Z-07	1580.88	0	1	2009	62	0	1	426	14	T2	0	N3a	1	1	0	Stage IIIC	1	0	0	0	0	1
TCGA-BH-A0HW-01A-11R-A034-07	1652.7	0	1	2006	62	0	0	1561	52	T1c	1	N0 (i-)	0	0	0	Stage IA	0	1	0		0	0
TCGA-AC-A23C-01A-12R-A169-07	1704.92	0	1	2010	62	0	0	29	0	T2	0	N1	1	1		Stage IIB	0	1	1	1	1	0
TCGA-A2-A0SY-01A-31R-A084-07	1706.27	0	1	2007	62	0	0	1154	38	T3	0	N1	1	1	0	Stage IIIA	1	1	1		1	0
TCGA-D8-A27V-01A-12R-A17B-07	1721.48	0	1	2011	62	0	0	73	2	T2	0	N0	0	0	0	Stage IIA	0	1	1	0	0	0
TCGA-A2-A0T4-01A-31R-A084-07	1755.98	0	1	2009	62	0	0	395	13	T2	0	N0 (i-)	0	0	0	Stage IIA	0	1	1		0	0
TCGA-A7-A4SC-01A-12R-A266-07	1773.82	0	1	2012	62	0	0	215	7	T3	0	N0	0	0		Stage IIB	0	1	0		0	0
TCGA-BH-A0GZ-01A-11R-A056-07	1779.53	0	1	2009	62	0	0	328	10	T1c	1	N1a	1	1	0	Stage IIA	0	1	1		0	0
TCGA-A7-A13E-01A-11R-A12P-07	1793.53	0	1	2010	62	0	0	287	9	T2	0	N1	1	1		Stage IIB	0	1	0		0	0
TCGA-A2-A0ST-01A-12R-A084-07	1839.38	0	1	2003	62	0	0	2619	87	T1c	1	N1a	1	1	0	Stage IIA	0	0	0		0	1
TCGA-BH-A1F5-01A-12R-A13Q-07	2224.02	1		2002	62	0	1	2712	90	T1c	1	N1a	1	1	0	Stage IIA	0	1	1	0	0	0
TCGA-A7-A3IZ-01A-11R-A213-07	2243.32	1	1	2011	62	0	0	148	4	T2	0	N0 (i+)	0	1	0	Stage IIA	0	1	0		0	0
TCGA-GM-A2DB-01A-31R-A18M-07	2275.91	1	1	2006	62	0	0	1616	53	T2	0	N0 (i-)	0	0	0	Stage IIA	0	0	0	0	0	1
TCGA-A2-A1FW-01A-11R-A13Q-07	2331.58	1	1	2010	62	0	0	221	7	T3	0	N2a	1	1	0	Stage IIIA	1	1	0	0	0	0
TCGA-AR-A1AT-01A-11R-A12P-07	2452.57	1	1	2007	62	0	1	1272	42	T2	0	N0	0	0	0	Stage IIA	0	1	1	1	1	0
TCGA-D8-A1JG-01B-11R-A13Q-07	2622.6	1	1	2010	62	0	0	187	6	T2	0	N0	0	0	0	Stage IIA	0	0	0		0	1
TCGA-A7-A0DA-01A-31R-A115-07	2880.52	1	1	2009	62	0	0	373	12	T2	0	N0 (i-)	0	0	0	Stage IIA	0	0	0	0	0	1
TCGA-A2-A04T-01A-21R-A034-07	2955.06	1	1	2004	62	0	0	1950	65	T2	0	N0 (i-)	0	0	0	Stage IIA	0	0	0		0	1
TCGA-AR-A255-01A-11R-A169-07	3202.05	1	1	2007	62	0	0	1059	35	T1	1	N0	0	0	0	Stage I	0	1	1	1	1	0
TCGA-D8-A140-01A-11R-A115-07	3222.92	1	1	2010	62	0	0	27	0	T2	0	N1a	1	1	0	Stage IIB	0	1	1	1	1	0
TCGA-AR-A2LK-01A-11R-A180-07	3338.26	1	1	2007	62	0	0	1304	43	T3	0	N2	1	1	0	Stage III	1	1	1		0	0
TCGA-D8-A1X8-01A-11R-A14M-07	3346.54	1	1	2010	62	0	0	272	9	T1c	1	N2a	1	1	0	Stage IIIA	1	1		0	0
TCGA-BH-A0C0-01A-21R-A056-07	3751.48	1	1	2007	62	0	0	1270	42	T1c	1	N1a	1	1	0	Stage IIA	0	1	1		1	0
TCGA-D8-A1JE-01A-11R-A13Q-07	3807.74	1	1	2010	62	0	0	57	1	T1c	1	N1a	1	1	0	Stage IIA	0	1	1	0	0	0
TCGA-AN-A049-01A-21R-A00Z-07	3862.76	1	1	2008	62	0	0	19	0	T2	0	N0	0	0	0	Stage IIA	0	1	1	0	0	0
TCGA-AN-A0AT-01A-11R-A034-07	4690.98	1	1	2010	62	0	0	10	0	T2	0	N0	0	0	0	Stage IIA	0	0	0	0	0	1
TCGA-E2-A14R-01A-11R-A115-07	6501.43	1	1	2008	62	0	0	845	28	T2	0	N0	0	0	0	Stage IIA	0	0	0	0	0	1
TCGA-AN-A0FT-01A-11R-A034-07	572.092	0	1	2010	63	0	0	183	6	T2	0	N1	1	1	0	Stage IIB	0	1	1	1	1	0
TCGA-GM-A5PV-01A-11R-A28M-07	645.264	0	1	2011	63	0	0	412	13	T2	0	N1a	1	1	0	Stage IIB	0	1	1		0	0
TCGA-B6-A1KI-01A-11R-A14M-07	772.301	0	1	2003	63	0	0	1463	48	T1c	1	N0	0	0	0	Stage I	0	1	1		0	0
TCGA-OL-A5RU-01A-11R-A28M-07	772.354	0	1	2010	63	0	0	841	28	T1c	1	N1	1	1		Stage IIA	0	1	1		0	0
TCGA-A8-A06P-01A-11R-A00Z-07	820.886	0	1	2009	63	0	0	396	13	T1c	1	N2a	1	1	0	Stage IIIA	1	1	1	0	0	0
TCGA-A7-A0DC-01A-11R-A00Z-07	881.962	0	1	2009	63	0	0	273	9	T1c	1	N0 (i-)	0	0	0	Stage IA	0	1	0	0	0	0
TCGA-E9-A5UP-01A-11R-A28M-07	910.144	0	1	2012	63	0	0	0	0	T2	0	N0	0	0	0	Stage IIA	0
TCGA-5L-AAT1-01A-12R-A41B-07	1000	0		2010	63	0	0	1471	49	T2	0	N0	0	0	1	Stage IV	1	1	1
TCGA-E2-A1BC-01A-11R-A12P-07	1003.18	0		2010	63	0	0	297	9	T1c	1	N0	0	0	0	Stage IA	0	1	1	0	0	0
TCGA-BH-A0DI-01A-21R-A12P-07	1020.39	0	1	2009	63	0	0	673	22	T2	0	N1a	1	1	0	Stage IIB	0	1	1	0	0	0
TCGA-AN-A0XS-01A-22R-A109-07	1043.57	0	1	2010	63	0	0	10	0	T2	0	N2	1	1	0	Stage IIIA	1	0	1	0	0	0
TCGA-BH-A5J0-01A-11R-A27Q-07	1044.49	0	1	2012	63	0	0	225	7	T1c	1	N0	0	0	0	Stage IA	0	1	1	0	0	0
TCGA-GM-A3NW-01A-21R-A22K-07	1103.84	0	1	2003	63	0	0	2982	99	T2	0	N0 (i-)	0	0	0	Stage IIA	0	0	1		0	0
TCGA-E9-A1R6-01A-11R-A14D-07	1269.75	0	1	2010	63	0	0	84	2	T2	0	N0	0	0	0	Stage IIA	0
TCGA-E9-A54Y-01A-11R-A466-07	1322.87	0	1	2012	63	0	0	7	0	T2	0	N2	1	1	0	Stage IIIA	1	1	1	0	0	0
TCGA-A2-A0CY-01A-12R-A034-07	1436.46	0	1	2006	63	0	0	1288	42	T2	0	N1	1	1	0	Stage IIB	0	1	1	0	0	0
TCGA-BH-A18H-01A-11R-A12D-07	1591.61	0	1	2010	63	0	0	0	0	T1b	1	N0	0	0	0	Stage IA	0	1	1	1	1	0
TCGA-A2-A0YD-01A-11R-A109-07	1639.42	0	1	2009	63	0	0	550	18	T3	0	N0 (i+)	0	1	0	Stage IIB	0	1	1		0	0
TCGA-EW-A1OY-01A-11R-A144-07	1640.31	0	1	2009	63	0	0	593	19	T2	0	N0	0	0		Stage IIA	0	1	1	0	0	0
TCGA-A7-A3J1-01A-11R-A213-07	1690.65	0		2011	63	0	0	75	2	T1c	1	N0	0	0		Stage IA	0	1	1	0	0	0
TCGA-A2-A1FZ-01A-51R-A14D-07	1801.82	0	1	2010	63	0	0	410	13	T2	0	N0 (i-)	0	0	0	Stage IIA	0	1	1	0	0	0
TCGA-E9-A2JT-01A-22R-A18M-07	1842.07	0	1	2011	63	0	0	23	0	T2	0	N0 (i-)	0	0	0	Stage IIA	0
TCGA-AO-A12B-01A-11R-A10J-07	1985.83	0	1	2004	63	0	0	2359	78	T2	0	N0 (i-)	0	0	0	Stage IIA	0	1	1	0	0	0
TCGA-GI-A2C8-01A-11R-A16F-07	2006.69	0		2004	63	0	0	225	7	T4b	0	N0	0	0		Stage IIIB	1	1	1	0	0	0
TCGA-BH-A0DH-01A-11R-A084-07	2086.94	0	1	2007	63	0	0	1156	38	T2	0	N1a	1	1	0	Stage IIB	0	1	1	0	0	0
TCGA-UU-A93S-01A-21R-A41B-07	2298.12	1	1	2013	63	0	1	116	3	T4d	0	N3b	1	1	1	Stage IV	1	0	0	1	1	0
TCGA-E9-A1R5-01A-11R-A14M-07	2457.4	1	1	2011	63	0	0	42	1	T1c	1	N0	0	0	0	Stage IA	0
TCGA-A2-A0SV-01A-11R-A084-07	2664.56	1	1	2006	63	0	1	825	27	T2	0	N2a	1	1	1	Stage IV	1	1	1		0	0
TCGA-A2-A0YG-01A-21R-A109-07	2674.98	1	1	2009	63	0	0	404	13	T2	0	N3a	1	1	0	Stage IIIC	1	1	1	1	1	0
TCGA-A2-A0ER-01A-21R-A034-07	2683.89	1	1	2005	63	0	0	1903	63	T1c	1	N1mi	1	1	0	Stage IB	0	1	1		0	0
TCGA-C8-A274-01A-11R-A16F-07	3145.9	1	1	2010	63	0	0	1	0	T2	0	N0	0	0	0	Stage IIA	0	1	1	0	0	0
TCGA-E2-A1AZ-01A-11R-A12P-07	3837.21	1	1	2004	63	0	0	1965	65	T2	0	N1a	1	1	0	Stage IIB	0	0	0		0	1
TCGA-A8-A06Q-01A-11R-A034-07	4066.41	1	1	2007	63	0	0	31	1	T3	0	N2	1	1	0	Stage IIIA	1	1	1	0	0	0
TCGA-E9-A1RH-01A-21R-A169-07	7044.01	1	1	2011	63	0	0	14	0	T2	0	N0	0	0	0	Stage IIA	0
TCGA-S3-AA0Z-01A-11R-A41B-07	9197.67	1	1	2013	63	0	0	322	10	T2	0	N1a	1	1	0	Stage IIB	0	1	1		0	0
TCGA-A8-A08T-01A-21R-A00Z-07	899.501	0	1	2002	64	0	0	2830	94	T2	0	N1a	1	1	1	Stage IV	1	1	1	1	1	0
TCGA-D8-A27P-01A-11R-A16F-07	964.145	0	1	2011	64	0	0	23	0	T1c	1	N0	0	0	0	Stage IA	0	1	1	0	0	0
TCGA-LL-A5YL-01A-12R-A29R-07	1190	0	1	2012	64	0	0	169	5	T2	0	N1a	1	1		Stage IIB	0	1	0	1	1	0
TCGA-PE-A5DD-01A-12R-A27Q-07	1258.45	0	1	2006	64	0	0	1953	65	T2	0	N0	0	0	0	Stage IIA	0	1	0	1	1	0
TCGA-EW-A1P6-01A-11R-A144-07	1319.75	0	1	2010	64	0	0	312	10	T2	0	N1a	1	1	0	Stage IIB	0	1	1	0	0	0
TCGA-E2-A108-01A-13R-A10J-07	1393.62	0	1	2009	64	0	0	124	4	T2	0	N2a	1	1	0	Stage IIIA	1	1	1	0	0	0
TCGA-AR-A0TX-01A-11R-A084-07	1646.02	0	1	2005	64	0	0	15	0	T1	1	N1	1	1	0	Stage IIA	0	1	1	1	1	0
TCGA-D8-A1XA-01A-11R-A14D-07	1662.07	0	1	2010	64	0	0	274	9	T1c	1	N0	0	0	0	Stage IA	0	1	1
TCGA-C8-A135-01A-11R-A115-07	1667.28	0	1	2010	64	0	0	13	0	T2	0	N1	1	1	0	Stage IIB	0	0	0	1	1	0
TCGA-S3-A6ZF-01A-32R-A32P-07	1750.99	0	1	2013	64	0	0	212	7	T2	0	N0	0	0	0	Stage IIA	0	1	1		0	0
TCGA-S3-AA17-01A-11R-A41B-07	1785.54	0		2013	64	0	0	119	3	T2	0	N1mi	1	1	0	Stage IIB	0	1	1		0	0
TCGA-E2-A15R-01A-11R-A115-07	1799.4	0	1	2010	64	0	0	330	11	T1c	1	N1a	1	1	0	Stage IIA	0	1	1		0	0
TCGA-A2-A0EQ-01A-11R-A034-07	1962.28	0	1	2004	64	0	0	2053	68	T2	0	N0 (i-)	0	0	0	Stage IIA	0	0	0	1	1	0
TCGA-BH-A0B8-01A-21R-A056-07	2029.07	0	1	2006	64	0	0	1569	52	T1b	1	N0 (i-)	0	0	0	Stage I	0	1	1		0	0
TCGA-E2-A14Z-01A-11R-A115-07	2059.19	0	1	2009	64	0	0	518	17	T1c	1	N0	0	0	0	Stage I	0	1	1	0	0	0
TCGA-E9-A1R7-01A-11R-A14M-07	2176.99	1	1	2011	64	0	0	34	1	T2	0	N0	0	0	0	Stage IIA	0
TCGA-AR-A1AX-01A-11R-A12P-07	2237.05	1	1	2007	64	0	0	1103	36	T1	1	N0	0	0	0	Stage I	0	1	1	1	1	0
TCGA-AO-A0JC-01A-11R-A056-07	2266.2	1	1	2006	64	0	0	1547	51	T2	0	N0 (i-)	0	0	0	Stage IIA	0	1	1	0	0	0
TCGA-E2-A15F-01A-11R-A115-07	2459.49	1	1	2009	64	0	0	469	15	T1c	1	N0	0	0	0	Stage I	0	1	1	0	0	0
TCGA-E2-A10E-01A-21R-A10J-07	2529.28	1	1	2008	64	0	0	418	13	T1c	1	N1a	1	1	0	Stage IIA	0	1	1		0	0
TCGA-BH-A201-01A-11R-A14M-07	2695.82	1	1	2011	64	0	0	210	7	T1	1	N0	0	0	0	Stage IA	0	1	1	0	0	0
TCGA-A8-A0A6-01A-12R-A056-07	3007.85	1	1	2009	64	0	0	640	21	T2	0	N3a	1	1	0	Stage IIIC	1	1	1	0	0	0
TCGA-E2-A109-01A-11R-A10J-07	3739.8	1	1	2007	64	0	0	1172	39	T2	0	N0 (i-)	0	0	0	Stage IIA	0	1	0		0	0
TCGA-BH-A0DL-01A-11R-A115-07	3794.94	1	1	2007	64	0	0	1467	48	T2	0	N0	0	0	0	Stage IIA	0	1	0	0	0	0
TCGA-AC-A2FO-01A-11R-A180-07	798.681	0	1	2005	65	0	0	1542	51	T2	0	N1	1	1		Stage IIB	0	1	0	0	0	0
TCGA-A8-A07F-01A-11R-A00Z-07	896.746	0	1	2009	65	0	0	577	19	T2	0	N1a	1	1	0	Stage IIB	0	1	1	0	0	0
TCGA-C8-A133-01A-32R-A12D-07	931.163	0	1	2010	65	0	0	0	0	T3	0	N1	1	1	0	Stage IIIA	1	1	1
TCGA-GM-A5PX-01A-12R-A28M-07	988.277	0	1	2011	65	0	0	551	18	T2	0	N1mi	1	1	0	Stage IIB	0	1	1	0	0	0
TCGA-AC-A2FB-01A-11R-A17B-07	1047.73	0		2009	65	0	0	44	1	T2	0	N0	0	0		Stage IIA	0	1	1	1	1	0
TCGA-BH-A0H7-01A-13R-A056-07	1151.67	0	1	2008	65	0	0	702	23	T1c	1	N2a	1	1	0	Stage IIIA	1	1	1	0	0	0
TCGA-AR-A2LN-01A-21R-A18M-07	1276.6	0	1	2010	65	0	0	520	17	T2	0	N0	0	0	0	Stage IIA	0	1	1	0	0	0
TCGA-A8-A07G-01A-11R-A034-07	1390.8	0	1	2009	65	0	0	577	19	T1c	1	N1a	1	1	0	Stage IIA	0	1	1	0	0	0
TCGA-AC-A3W5-01A-11R-A22K-07	1446.32	0		2011	65	0	0	55	1	T2	0	N0	0	0		Stage IIA	0	1	1		1	0
TCGA-A8-A08C-01A-11R-A00Z-07	1659.67	0	1	2008	65	0	0	608	20	T2	0	N0	0	0	0	Stage IIA	0	1	1	1	1	0
TCGA-E9-A5FL-01A-11R-A27Q-07	1704.13	0	1	2012	65	0	0	8	0	T3	0	N0	0	0	0	Stage IIB	0	0	0	0	0	1
TCGA-E2-A15L-01A-11R-A12D-07	1809.71	0	1	2010	65	0	0	331	11	T2	0	N0	0	0	0	Stage IIA	0	1	1		0	0
TCGA-BH-A0HP-01A-12R-A084-07	1814.29	0	1	2009	65	0	0	414	13	T3	0	N2a	1	1	0	Stage IIIA	1	1	0	0	0	0
TCGA-E2-A15T-01A-11R-A115-07	2137.24	0	1	2010	65	0	0	267	8	T2	0	N0	0	0	0	Stage IIA	0	1	1		0	0
TCGA-AR-A1AW-01A-21R-A12P-07	2471.81	1	1	2007	65	0	0	1072	35	T2	0	N0	0	0	0	Stage IIA	0	1	1		0	0
TCGA-A8-A097-01A-11R-A034-07	2489.53	1	1	2009	65	0	0	365	12	T2	0	N1	1	1	0	Stage IIB	0	1	1	1	1	0
TCGA-A7-A26I-01A-11R-A169-07	2865.01	1		2011	65	0	0	122	4	T2	0	N0	0	0	0	Stage IIA	0	0	0		0	1
TCGA-AR-A24H-01A-11R-A169-07	2922.54	1	1	2001	65	0	0	3333	111	T2	0	N0	0	0	0	Stage IIA	0	1	1	0	0	0
TCGA-D8-A1Y0-01A-11R-A14M-07	3092.77	1	1	2010	65	0	0	167	5	T1c	1	N2a	1	1		Stage IIIA	1	1	1	0	0	0
TCGA-E2-A14S-01A-11R-A12D-07	3128.13	1	1	2008	65	0	0	834	27	T1c	1	N0	0	0	0	Stage I	0	1	1		0	0
TCGA-AR-A1AY-01A-21R-A12P-07	3255.63	1	1	2008	65	0	0	615	20	T1	1	N0	0	0	0	Stage I	0	0	0	0	0	1
TCGA-S3-AA10-01A-21R-A41B-07	4195.24	1	1	2013	65	0	0	241	8	T2	0	N0	0	0	0	Stage IIA	0	0	0	0	0	1
TCGA-A2-A4S1-01A-21R-A266-07	924.87	0	1	2012	66	1	0	365	12	T2	0	N0	0	0	0	Stage IIA	0	1	0	0	0	0
TCGA-W8-A86G-01A-21R-A36F-07	956.336	0		2013	66	1	0	161	5	T2a	0	N0 (i-)	0	0		Stage IIA	0	1	1	0	0	0
TCGA-D8-A27E-01A-11R-A16F-07	968.397	0	1	2010	66	1	0	182	6	T1c	1	N0	0	0	0	Stage IA	0	1	1	0	0	0
TCGA-AC-A3YJ-01A-11R-A22U-07	1042.85	0	1	2012	66	1	0	40	1	T2	0	N0 (i-)	0	0		Stage IIA	0	1	1
TCGA-A2-A04N-01A-11R-A115-07	1106.97	0	1	2002	66	1	0	3153	105	T1c	1	N0 (i-)	0	0	0	Stage IA	0	1	1		0	0
TCGA-A8-A06Y-01A-21R-A00Z-07	1166.99	0	1	2008	66	1	0	791	26	T2	0	N0	0	0	0	Stage IIA	0	1	1	0	0	0
TCGA-OL-A5S0-01A-11R-A28M-07	1226.21	0	1	2012	66	1	0	298	9	T2	0	N1a	1	1		Stage IIB	0	1	0		1	0
TCGA-B6-A0IO-01A-11R-A034-07	1285.63	0		2001	66	1	0	3350	111	T2	0	N0 (i-)	0	0	0	Stage IIA	0	1
TCGA-A2-A0SU-01A-11R-A084-07	1419.29	0	1	2006	66	1	0	1352	45	T2	0	N0 (i+)	0	1	0	Stage IIA	0	1	1	0	0	0
TCGA-A2-A0T2-01A-11R-A084-07	1513.15	0	1	2009	66	1	1	255	8	T3	0	N3	1	1	1	Stage IV	1	0	0	0	0	1
TCGA-BH-A0B1-01A-12R-A056-07	1763.04	0	1	2007	66	1	0	1148	38	T2	0	N1a	1	1	0	Stage IIB	0	1	1	0	0	0
TCGA-A8-A076-01A-21R-A00Z-07	1773.62	0	1	2006	66	1	0	1642	54	T2	0	N0	0	0	0	Stage IIA	0	1	1	1	1	0
TCGA-A8-A06N-01A-11R-A00Z-07	1787.98	0	1	2009	66	1	0	0	0	T4b	0	N0	0	0	0	Stage IIIB	1	1	0	0	0	0
TCGA-E9-A1R4-01A-21R-A14D-07	1851.55	0	1	2011	66	1	0	29	0	T1c	1	N0	0	0	0	Stage IA	0
TCGA-A8-A08H-01A-21R-A00Z-07	2119.61	0	1	2007	66	1	0	0	0	T2	0	N0	0	0	0	Stage IIA	0	1	1	1	1	0
TCGA-A7-A0CD-01A-11R-A00Z-07	2371.44	1		2009	66	1	0	171	5	T1	1	N0	0	0	0	Stage I	0	1	1		0	0
TCGA-D8-A1X9-01A-12R-A157-07	2521.06	1	1	2010	66	1	0	380	12	T2	0	N1a	1	1	0	Stage IIB	0	1	1		0	0
TCGA-A8-A07U-01A-11R-A034-07	2676.3	1	1	2009	66	1	0	303	10	T2	0	N2a	1	1	0	Stage IIIA	1	0	1	0	0	0
TCGA-AN-A03Y-01A-21R-A00Z-07	2714.54	1	1	2010	66	1	0	10	0	T2	0	N0	0	0	0	Stage IIA	0	1	1	0	0	0
TCGA-A8-A0A2-01A-11R-A034-07	2782.01	1	1	2009	66	1	0	579	19	T2	0	N0	0	0	0	Stage IIA	0	1	1	0	0	0
TCGA-AR-A0TV-01A-21R-A084-07	3303.54	1	1	2005	66	1	0	905	30	T2	0	N0	0	0	0	Stage IIA	0	1	1		0	0
TCGA-E2-A15M-01A-11R-A12D-07	3329.21	1	1	2010	66	1	0	235	7	T2	0	N0	0	0	0	Stage IIA	0	1	1	0	0	0
TCGA-A2-A25F-01A-11R-A169-07	3902.65	1	1	2011	66	1	0	114	3	T2	0	N0 (i-)	0	0	0	Stage IIA	0	0	1	0	0	0
TCGA-EW-A1PC-01B-11R-A21T-07	9579.96	1	1	2011	66	1	0	187	6	T3	0	N0 (i-)	0	0		Stage IIB	0	1	1	0	0	0
TCGA-A8-A083-01A-21R-A00Z-07	817.403	0	1	2008	67	1	0	0	0	T3	0	N0	0	0	0	Stage IIB	0	1	1	0	0	0
TCGA-GM-A4E0-01A-12R-A266-07	956.797	0	1	2007	67	1	0	1753	58	T3	0	N3a	1	1	0	Stage IIIC	1	1	1		0	0
TCGA-S3-AA11-01A-31R-A41B-07	1243.45	0	1	2013	67	1	0	169	5	T2	0	N0	0	0	0	Stage IIA	0	1	1		0	0
TCGA-BH-A0GY-01A-11R-A056-07	1247.97	0	1	2008	67	1	0	917	30	T2	0	N1	1	1	0	Stage IIA	0	1	1	0	0	0
TCGA-AN-A0FW-01A-11R-A034-07	1275.11	0	1	2010	67	1	0	11	0	T2	0	N2	1	1	0	Stage IIIA	1	1		0	0
TCGA-E9-A1RD-01A-11R-A157-07	1299.54	0	1	2011	67	1	0	20	0	T2	0	N0	0	0	0	Stage IIA	0
TCGA-A2-A0CW-01A-21R-A115-07	1519.18	0	1	2006	67	1	0	1750	58	T2	0	N1a	1	1	0	Stage IIB	0	1	1		0	0
TCGA-OL-A97C-01A-32R-A41B-07	1525.32	0	1	2013	67	1	0	195	6	T3	0	N0	0	0	0	Stage IIB	0	0	0		0	1
TCGA-LL-A73Y-01A-11R-A33J-07	1916.57	0	1	2013	67	1	0	126	4	T1c	1	N0	0	0		Stage IA	0	0	0	0	0	1
TCGA-A2-A4RX-01A-11R-A266-07	2004.41	0	1	2012	67	1	0	274	9	T2	0	N0	0	0	0	Stage IIA	0	1	1	0	0	0
TCGA-AN-A0XV-01A-11R-A109-07	2064.16	0	1	2010	67	1	0	162	5	T2	0	N2	1	1	0	Stage IIIA	1	1	1	1	1	0
TCGA-BH-A0HN-01A-11R-A10U-07	2111.11	0	1	2009	67	1	0	516	17	T1c	1	N0 (i-)	0	0	0	Stage IA	0	1	1		0	0
TCGA-AO-A0J3-01A-11R-A034-07	2254.55	1	1	2009	67	1	0	302	10	T2	0	N1b	1	1	0	Stage IIB	0	1	1		0	0
TCGA-E2-A10B-01A-11R-A10J-07	2724.32	1	1	2007	67	1	0	748	24	T2	0	N1a	1	1	0	Stage IIB	0	1	1		0	0
TCGA-C8-A12L-01A-11R-A115-07	2928.77	1	1	2010	67	1	0	0	0	T2	0	N0 (i-)	0	0	0	Stage IIA	0	0	0
TCGA-A2-A0YF-01A-21R-A109-07	3046.23	1	1	2009	67	1	0	289	9	T1b	1	N0 (i+)	0	1	0	Stage I	0	1	0	0	0	0
TCGA-B6-A1KC-01B-11R-A157-07	3364.28	1	1	2003	67	1	0	1326	44	T2	0	N1	1	1	0	Stage IIA	0	1	0	0	0	0
TCGA-A2-A0YM-01A-11R-A109-07	4661.9	1	1	2008	67	1	0	662	22	T2	0	N0 (i-)	0	0	0	Stage IIA	0	0	0		0	1
TCGA-A1-A0SO-01A-22R-A084-07	5829.09	1	1	2007	67	1	0	852	28	T2	0	N1	1	1	0	Stage IIB	0	0	0		0	1
TCGA-A8-A07P-01A-11R-A00Z-07	758.811	0	1	2009	68	1	0	334	11	T2	0	N1	1	1	0	Stage IIB	0	1	1	1	1	0
TCGA-D8-A4Z1-01A-21R-A266-07	794.032	0	1	2012	68	1	0	223	7	T1c	1	N0	0	0	0	Stage IA	0	1	1	0	0	0
TCGA-E9-A1RF-01A-11R-A157-07	891.534	0	1	2011	68	1	0	38	1	T2	0	N2	1	1	0	Stage IIIA	1
TCGA-EW-A1P1-01A-31R-A14D-07	911.765	0	1	2008	68	1	0	920	30	T2	0	N3b	1	1		Stage IIIC	1	0	0		0	1
TCGA-AO-A0JF-01A-11R-A056-07	1086.47	0	1	2009	68	1	0	354	11	T1c	1	N1a	1	1	0	Stage IIA	0	1	1	0	0	0
TCGA-XX-A89A-01A-11R-A36F-07	1121.87	0	1	2013	68	1	0	278	9	T3	0	N0	0	0		Stage IIB	0	1	1	0	0	0
TCGA-AN-A046-01A-21R-A034-07	1256.72	0	1	2010	68	1	0	10	0	T2	0	N0	0	0	0	Stage IIA	0	1	1	0	0	0
TCGA-A8-A09K-01A-11R-A00Z-07	1348.52	0		2008	68	1	0	912	30	T1c	1	N1	1	1	0	Stage IIA	0	1	1	0	0	0
TCGA-AR-A5QN-01A-12R-A28M-07	1353.23	0	1	2012	68	1	0	396	13	T2	0	N3	1	1	0	Stage IIIC	1	1	1	1	1	0
TCGA-AN-A0XN-01A-21R-A109-07	1440.1	0	1	2010	68	1	0	10	0	T2	0	N2	1	1	0	Stage IIIA	1	0	1	0	0	0
TCGA-C8-A3M8-01A-11R-A213-07	1706.13	0	1	2011	68	1	0	7	0	T1c	1	N0	0	0	0	Stage IA	0	1	1	1	1	0
TCGA-AC-A3OD-01A-11R-A21T-07	2050.61	0	1	2011	68	1	0	35	1	T2	0	N1mi	1	1		Stage IIB	0	1	1	0	0	0
TCGA-A8-A09T-01A-11R-A00Z-07	2114.78	0	1	2009	68	1	0	579	19	T1c	1	N0	0	0		Stage X		1	1	0	0	0
TCGA-AR-A0TR-01A-11R-A084-07	2189.27	1	1	2006	68	1	1	160	5	T2	0	N1	1	1	0	Stage IIB	0	1	1		0	0
TCGA-E2-A154-01A-11R-A115-07	2291.25	1	1	2009	68	1	0	325	10	T1c	1	N0	0	0	0	Stage I	0	1	1	0	0	0
TCGA-AR-A5QQ-01A-11R-A28M-07	2452.06	1	1	2011	68	1	1	322	10	T3	0	N1	1	1	0	Stage IIIA	1	0	0	0	0	1
TCGA-BH-A0EE-01A-11R-A034-07	2754.48	1	1	2007	68	1	0	943	31	T3	0	N0 (i-)	0	0	0	Stage IIB	0	0	0	1	1	0
TCGA-A7-A6VX-01A-12R-A33J-07	4798.4	1	1	2013	68	1	0	169	5	T2	0	N0	0	0	0	Stage IIA	0	1	1	0	0	0
TCGA-LL-A9Q3-01A-11R-A41B-07	383.175	0	1	2013	69	1	0	224	7	T3	0	N3a	1	1		Stage IIIC	1	1	1	1	1	0
TCGA-E2-A576-01A-11R-A31O-07	519.248	0	1	2011	69	1	0	578	19	T1c	1	N0	0	0		Stage IA	0	1	1		0	0
TCGA-BH-A0H9-01A-11R-A056-07	915.649	0	1	2007	69	1	0	1247	41	T2	0	N0 (i-)	0	0	0	Stage IIA	0	1	1		0	0
TCGA-BH-A0EB-01A-11R-A034-07	941.389	0	1	2008	69	1	0	745	24	T1c	1	N0 (i-)	0	0	0	Stage IA	0	1	1		0	0
TCGA-E2-A56Z-01A-12R-A29R-07	1011.72	0	1	2012	69	1	0	219	7	T2	0	N1a	1	1	0	Stage IIB	0	1	1		0	0
TCGA-AN-A0XP-01A-11R-A109-07	1135.05	0	1	2010	69	1	0	9	0	T2	0	N2	1	1	0	Stage IIIA	1	1	1	1	1	0
TCGA-AO-A12H-01A-11R-A115-07	1306.14	0	-1	2008	69	1	0	863	28	T2	0	N0 (i-)	0	0	0	Stage IIA	0	1	1	0	0	0
TCGA-AR-A2LE-01A-11R-A180-07	1751	0	1	2001	69	1	0	3913	130	T1	1	N0	0	0	0	Stage I	0	1	0
TCGA-E9-A24A-01A-11R-A169-07	1751.65	0	1	2011	69	1	0	11	0	T1c	1	N1	1	1	0	Stage IIA	0
TCGA-A8-A09C-01A-11R-A00Z-07	1926.65	0		2009	69	1	0	31	1	T2	0	N0	0	0		Stage X		1	1	0	0	0
TCGA-GM-A2D9-01A-11R-A18M-07	2172.81	1	1	2006	69	1	1	1812	60	T1c	1	N0 (i-)	0	0	0	Stage I	0	1	1		0	0
TCGA-A8-A06R-01A-11R-A00Z-07	2267.28	1	1	2007	69	1	0	547	18	T2	0	N1a	1	1	0	Stage IIB	0	1	0	1	1	0
TCGA-AO-A1KS-01A-11R-A13Q-07	2392.8	1	1	2010	69	1	0	16	0	T2	0	N0 (i-)	0	0	0	Stage IIA	0	1	1		0	0
TCGA-D8-A1XQ-01A-11R-A14M-07	3226.05	1	1	2010	69	1	0	177	5	T2	0	N0	0	0	0	Stage IIA	0	0	0	0	0	1
TCGA-A8-A07I-01A-11R-A00Z-07	3229.63	1	1	2009	69	1	0	426	14	T2	0	N2a	1	1	0	Stage IIIA	1	1	0	1	1	0
TCGA-BH-A0E6-01A-11R-A034-07	3292.99	1	1	2009	69	1	0	293	9	T1c	1	N0 (i-)	0	0	0	Stage IA	0	0	0		0	1
TCGA-BH-A0H0-01A-11R-A056-07	3966.63	1	1	2009	69	1	0	461	15	T1c	1	N0 (i-)	0	0	0	Stage IA	0	1	1	0	0	0
TCGA-A8-A079-01A-21R-A00Z-07	3992.21	1	1	2007	69	1	0	274	9	T4b	0	N3	1	1	0	Stage IIIB	1	1	1	0	0	0
TCGA-A8-A07B-01A-11R-A00Z-07	4583.26	1	1	2007	69	1	0	1004	33	T2	0	N0	0	0	0	Stage IIA	0	1	1	1	1	0
TCGA-AO-A03O-01A-11R-A00Z-07	4809.17	1	1	2002	69	1	1	2483	82	T2	0	N0 (i-)	0	0	0	Stage IIA	0	1	1	0	0	0
TCGA-A7-A425-01A-11R-A24H-07	588.087	0	1	2012	70	1	0	293	9	T3	0	N3a	1	1		Stage IIIC	1	1	1		0	0
TCGA-LL-A7T0-01A-31R-A352-07	824.388	0	1	2013	70	1	0	98	3	T2	0	N1a	1	1	0	Stage IIB	0	1	1	1	1	0
TCGA-E9-A1R3-01A-31R-A14M-07	873.998	0	1	2010	70	1	0	64	2	T2	0	N3	1	1	0	Stage IIIC	1
TCGA-A1-A0SB-01A-11R-A144-07	941.548	0	1	2008	70	1	0	259	8	T1c	1	N0	0	0	0	Stage I	0	1	0	0	0	0
TCGA-AQ-A0Y5-01A-11R-A14M-07	1220.37	0		2010	70	1	1	172	5	T2	0	N2a	1	1		Stage IIIA	1	1	1	1	1	0
TCGA-A2-A259-01A-11R-A16F-07	1313.26	0	1	2007	70	1	0	1286	42	T1c	1	N0 (i-)	0	0	0	Stage I	0	1	1	0	0	0
TCGA-A2-A0EN-01A-13R-A084-07	1365.22	0	1	2003	70	1	0	4088	136	T2	0	N0 (i+)	0	1	0	Stage IIA	0	1	1		0	0
TCGA-AR-A1AK-01A-21R-A12P-07	1438.12	0	1	2006	70	1	0	1559	51	T1	1	N0	0	0	0	Stage I	0	1	1	0	0	0
TCGA-AN-A0AS-01A-11R-A00Z-07	1612.53	0	1	2010	70	1	0	10	0	T2	0	N2	1	1	0	Stage IIIA	1	1	0	0	0	0
TCGA-A8-A08P-01A-11R-A00Z-07	1872.14	0	1	2008	70	1	0	943	31	T2	0	N2a	1	1	0	Stage IIIA	1	1	1	1	1	0
TCGA-EW-A1PB-01A-11R-A144-07	1908.57	0	1	2009	70	1	0	608	20	T3	0	N1a	1	1		Stage IIIA	1	0	0	0	0	1
TCGA-E9-A1N3-01A-12R-A157-07	1993.34	0	1	2010	70	1	0	0	0	T1c	1	N2	1	1	0	Stage IIIA	1
TCGA-AR-A2LL-01A-11R-A180-07	2192.42	1		2007	70	1	0	224	7	T3	0	N0	0	0	0	Stage IIB	0	1	1		0	0
TCGA-OL-A5D7-01A-11R-A27Q-07	2372	1	1	2009	70	1	0	1416	47	T2	0	N0	0	0		Stage IIA	0	0	0		0	1
TCGA-D8-A1JT-01A-31R-A13Q-07	2533.65	1	1	2010	70	1	0	123	4	T2	0	N0	0	0	0	Stage IIA	0	1	1		0	0
TCGA-A8-A09W-01A-11R-A00Z-07	3432.23	1	1	2007	70	1	0	30	1	T2	0	N3	1	1	0	Stage IIIB	1	1	1	0	0	0
TCGA-BH-A18T-01A-11R-A12D-07	3521.43	1	1	2003	70	1	1	224	7	T2	0	N0	0	0	0	Stage IIA	0	0	0	1	1	0
TCGA-EW-A1J6-01A-11R-A13Q-07	3858.73	1	1	2009	70	1	0	595	19	T1c	1	N0 (i-)	0	0	0	Stage I	0	1	1	0	0	0
TCGA-C8-A12M-01A-11R-A115-07	4440.56	1	1	2010	70	1	0	0	0	T2	0	N0 (i-)	0	0	0	Stage IIA	0	1	0	0	0	0
TCGA-E9-A295-01A-11R-A16F-07	605.578	0	1	2011	71	1	0	22	0	T2	0	N0 (i-)	0	0	0	Stage IIA	0	1	1	1	1	0
TCGA-OL-A66L-01A-12R-A31O-07	702.363	0	1	2010	71	1	0	945	31	T1c	1	N0	0	0		Stage IA	0	1	1		0	0
TCGA-E2-A1IK-01A-11R-A144-07	933.889	0	1	2009	71	1	0	519	17	T1c	1	N1mi	1	1	0	Stage IIA	0	1	1	0	0	0
TCGA-E9-A22B-01A-11R-A157-07	1055.28	0	1	2011	71	1	0	0	0	T1c	1	N0	0	0	0	Stage IA	0	1	0	0	0	0
TCGA-A2-A0CT-01A-31R-A056-07	1153.85	0	1	2005	71	1	0	1918	63	T2	0	N0 (i-)	0	0	0	Stage IIA	0	1	0		0	0
TCGA-E2-A1LE-01A-12R-A19W-07	1235.53	0	1	2008	71	1	1	879	29	T2	0	N3a	1	1	0	Stage IIIC	1	0	0	1	1	0
TCGA-AN-A0FD-01A-11R-A034-07	1388.05	0	1	2010	71	1	0	196	6	T2	0	N0	0	0	0	Stage IIA	0	1	1	1	1	0
TCGA-D8-A1Y2-01A-11R-A157-07	1507.12	0	1	2011	71	1	0	73	2	T2	0	N0	0	0		Stage IIA	0	1	1		0	0
TCGA-A7-A3IY-01A-21R-A21T-07	1685.02	0	1	2011	71	1	0	151	5	T1c	1	N0	0	0	0	Stage I	0	1	1	0	0	0
TCGA-AC-A8OS-01A-12R-A41B-07	1701.93	0	1	2013	71	1	0	70	2	T2	0	N0 (i-)	0	0		Stage IIA	0	1	1	1	1	0
TCGA-BH-A0DS-01A-11R-A056-07	1732.6	0	1	2010	71	1	0	78	2	T2	0	N2a	1	1	0	Stage IIIA	1	1	1	0	0	0
TCGA-A8-A08S-01A-11R-A034-07	1751.61	0		2008	71	1	0	580	19	T1c	1	N1	1	1	0	Stage IIA	0	1	1	1	1	0
TCGA-E9-A1NH-01A-11R-A14D-07	1855.1	0	1	2011	71	1	0	0	0	T2	0	N1	1	1	0	Stage IIB	0	1	1	0	0	0
TCGA-A7-A26E-01A-11R-A169-07	1940.8	0		2010	71	1	0	421	14	T3	0	N1a	1	1		Stage IIIA	1	1	1	0	0	0
TCGA-S3-A6ZG-01A-22R-A32P-07	2360.35	1	1	2013	71	1	0	207	6	T2	0	N1	1	1	0	Stage IIB	0	1	1	0	0	0
TCGA-BH-A0BW-01A-11R-A115-07	3254.24	1	1	2006	71	1	0	355	11	T1c	1	N0	0	0	0	Stage I	0	0	0		0	1
TCGA-AO-A0J7-01A-11R-A034-07	4235.59	1	1	2009	71	1	0	261	8	T2	0	N1	1	1	0	Stage IIB	0	1	1	0	0	0
TCGA-A2-A1G4-01A-11R-A13Q-07	5533.13	1		2010	71	1	0	372	12	T3	0	N1a	1	1	0	Stage IIIA	1	1	1	0	0	0
TCGA-E2-A572-01A-13R-A31O-07	483.319	0		2011	72	1	0	831	27	T2	0	N2	1	1	0	Stage IIIA	1	1	1		0	0
TCGA-OL-A66K-01A-11R-A29R-07	840.535	0	1	2010	72	1	0	1021	34	T2	0	N0	0	0		Stage IIA	0	1	1		0	0
TCGA-BH-A0EA-01A-11R-A115-07	1207.8	0		2008	72	1	1	991	33	T1c	1	N1a	1	1	0	Stage IIA	0	1	1	0	0	0
TCGA-AC-A8OP-01A-11R-A36F-07	1392.02	0	1	2011	72	1	0	53	1	T1c	1	N0 (i-)	0	0		Stage IA	0	1	1		0	0
TCGA-PE-A5DC-01A-12R-A27Q-07	1497.59	0	1	2005	72	1	1	1430	47	T2	0	N2a	1	1	0	Stage IIIA	1	1	1	1	1	0
TCGA-AO-A125-01A-11R-A10J-07	1656.83	0	1	2002	72	1	0	3019	100	T2	0	N0 (i-)	0	0	0	Stage IIA	0	1	1	0	0	0
TCGA-E9-A2JS-01A-11R-A180-07	1941.4	0	1	2011	72	1	0	13	0	T2	0	N1	1	1	0	Stage IIB	0
TCGA-AC-A8OQ-01A-11R-A41B-07	2050.01	0	1	2011	72	1	0	34	1	T2	0	N1a	1	1		Stage IIB	0	0	0
TCGA-AC-A62X-01A-11R-A29R-07	2298.32	1		2013	72	1	0	34	1	T2	0	N0	0	0		Stage IIA	0	1	0
TCGA-GM-A3NY-01A-11R-A21T-07	2490.47	1	1	2009	72	1	0	743	24	T2	0	N1a	1	1	0	Stage IIB	0	1	1	0	0	0
TCGA-D8-A27H-01A-11R-A16F-07	3367.63	1	1	2011	72	1	0	19	0	T2	0	N0	0	0	0	Stage IIA	0	0	0	0	0	1
TCGA-A7-A26H-01A-11R-A169-07	3487.99	1		2011	72	1	0	65	2	T1	1	N1a	1	1	0	Stage IIA	0	1	0		1	0
TCGA-D8-A1JL-01A-11R-A13Q-07	4258.14	1	1	2010	72	1	0	265	8	T2	0	N0	0	0	0	Stage IIA	0	0	0	0	0	1
TCGA-BH-A18U-01A-21R-A12D-07	5782.27	1	1	2003	72	1	1	1563	52	T2	0	N2a	1	1	0	Stage IIIA	1	1	1	1	1	0
TCGA-UL-AAZ6-01A-11R-A41B-07	838.369	0	1	2013	73	1	0	426	14	T2	0	N0	0	0		Stage IIA	0	1	1	1	1	0
TCGA-A2-A0CS-01A-11R-A115-07	912.783	0	1	2004	73	1	0	2298	76	T4b	0	N3a	1	1	1	Stage IV	1	1	1		0	0
TCGA-LD-A9QF-01A-32R-A41B-07	1188.94	0	1	2013	73	1	0	266	8	T1c	1	N0	0	0	0	Stage IA	0	0	0	1	1	0
TCGA-A2-A0CU-01A-12R-A034-07	1461.24	0	1	2005	73	1	1	158	5	T2	0	N0 (i+)	0	1	0	Stage IIA	0	1	1		0	0
TCGA-A2-A0EM-01A-11R-A034-07	1631.75	0	1	2002	73	1	0	2758	91	T1	1	N0 (i-)	0	0	0	Stage IA	0	1	1		0	0
TCGA-BH-A0BG-01A-11R-A115-07	1761.81	0	1	2008	73	1	0	756	25	T1	1	N0	0	0	0	Stage I	0	0	0	0	0	1
TCGA-D8-A1JP-01A-11R-A13Q-07	1983.19	0	1	2010	73	1	0	167	5	T1c	1	N0	0	0	0	Stage IA	0	1	1	0	0	0
TCGA-A8-A0A4-01A-11R-A00Z-07	2295.05	1	1	2009	73	1	0	396	13	T2	0	N0	0	0	0	Stage IIA	0	1	1	0	0	0
TCGA-A8-A07S-01A-11R-A034-07	2627.06	1	1	2009	73	1	0	243	8	T2	0	N0	0	0	0	Stage IIA	0	1	0	0	0	0
TCGA-AR-A0U0-01A-11R-A109-07	2790.22	1	1	2004	73	1	0	8	0	T2	0	N1	1	1	0	Stage IIB	0	0	0
TCGA-LQ-A4E4-01A-11R-A266-07	3032.72	1	1	2011	73	1	0	484	16	T3	0	N1a	1	1		Stage IIIA	1	1	1		0	0
TCGA-A8-A096-01A-11R-A00Z-07	3108.46	1	1	2009	73	1	0	0	0	T2	0	N0	0	0	0	Stage IIA	0	1	1	0	0	0
TCGA-AC-A6IW-01A-12R-A33J-07	3221.63	1	1	2013	73	1	0	21	0	T2	0	N0 (i-)	0	0		Stage IIA	0	0	0	0	0	1
TCGA-A8-A09E-01A-11R-A00Z-07	3283.1	1		2008	73	1	0	943	31	T4b	0	N1a	1	1	0	Stage IIIB	1	1	1	1	1	0
TCGA-E2-A1LL-01A-11R-A144-07	3539.37	1	1	2008	73	1	0	1014	33	T3	0	N2a	1	1		Stage IIIA	1	0	0	0	0	1
TCGA-E2-A14U-01A-11R-A22K-07	440.67	0	1	2008	74	1	0	838	27	T1c	1	N0	0	0	0	Stage I	0	1	1		0	0
TCGA-E2-A1B4-01A-11R-A12P-07	609.609	0	1	2008	74	1	0	911	30	T1c	1	N2a	1	1	0	Stage IIIA	1	1	1	0	0	0
TCGA-AC-A3YI-01A-21R-A239-07	954.838	0	1	2012	74	1	0	47	1	T1c	1	N3a	1	1		Stage IIIC	1	1	1	1	1	0
TCGA-D8-A142-01A-11R-A115-07	1003.72	0	1	2010	74	1	0	61	2	T3	0	N0	0	0	0	Stage IIB	0	0	0		0	1
TCGA-AC-A5XS-01A-11R-A29R-07	1022.47	0		2012	74	1	0	47	1	T2	0	N0	0	0		Stage IIA	0	1	1	0	0	0
TCGA-E9-A1RE-01A-11R-A157-07	1057.18	0	1	2011	74	1	0	47	1	T2	0	N2	1	1	0	Stage IIIA	1
TCGA-OL-A66H-01A-11R-A29R-07	1255.21	0	1	2012	74	1	0	413	13	T1c	1	N1mi	1	1		Stage IB	0	1	1		0	0
TCGA-D8-A1XY-01A-11R-A14M-07	1257.77	0	1	2010	74	1	0	81	2	T2	0	N0	0	0		Stage IIA	0	1	1	1	1	0
TCGA-E2-A1IF-01A-11R-A144-07	1382.36	0	1	2008	74	1	0	956	31	T1c	1	N0	0	0	0	Stage I	0	1	1	0	0	0
TCGA-AN-A03X-01A-21R-A00Z-07	1520.01	0	1	2010	74	1	0	10	0	T2	0	N0	0	0	0	Stage IIA	0	1	1	1	1	0
TCGA-E9-A22A-01A-11R-A157-07	1755.16	0	1	2011	74	1	0	0	0	T2	0	N0	0	0	0	Stage IIA	0	1	0	0	0	0
TCGA-A8-A090-01A-11R-A00Z-07	2048.01	0	1	2008	74	1	0	0	0	T2	0	N0	0	0	0	Stage IIA	0	1	1	1	1	0
TCGA-A2-A1FV-01A-11R-A13Q-07	2260.06	1	1	2010	74	1	0	461	15	T3	0	N0 (i+)	0	1	0	Stage IIB	0	1	1	0	0	0
TCGA-C8-A1HM-01A-12R-A137-07	5670.93	1	1	2010	74	1	0	6	0	T2	0	N0	0	0	0	Stage IIA	0	1	1	0	0	0
TCGA-AC-A3TN-01A-11R-A22K-07	371.954	0	1	2012	75	1	0	34	1	T3	0	N0	0	0		Stage IIB	0	1	1	1	1	0
TCGA-OL-A66P-01A-11R-A31O-07	982.014	0		2013	75	1	0	58	1	T2	0	N0	0	0		Stage IIA	0	0	0		0	1
TCGA-AC-A8OR-01A-21R-A41B-07	1184.78	0	1	2013	75	1	0	40	1	T1c	1	N0 (i-)	0	0		Stage IA	0	1	1	0	0	0
TCGA-AO-A12G-01A-11R-A10J-07	1277.6	0	1	2006	75	1	0	1266	42	T2	0	N0 (i+)	0	1	0	Stage IIA	0	1	1	1	1	0
TCGA-A8-A09M-01A-11R-A00Z-07	1720.64	0	1	2009	75	1	0	457	15	T2	0	N3a	1	1	0	Stage IIIC	1	1	1	0	0	0
TCGA-A8-A094-01A-11R-A00Z-07	1860.09	0	1	2009	75	1	0	0	0	T2	0	N0	0	0	0	Stage IIA	0	1	0	0	0	0
TCGA-E9-A1ND-01A-11R-A144-07	1953.51	0	1	2011	75	1	0	0	0	T2	0	N1	1	1	0	Stage IIB	0	0	0	1	1	0
TCGA-A8-A06T-01A-11R-A00Z-07	1998.64	0		2007	75	1	0	1249	41	T3	0	N1a	1	1	0	Stage IIIA	1	1	1	1	1	0
TCGA-D8-A27G-01A-11R-A16F-07	2600.52	1	1	2010	75	1	0	210	7	T2	0	N0	0	0	0	Stage IIA	0	1	1		0	0
TCGA-BH-A42T-01A-11R-A24H-07	3646.88	1	1	2012	75	1	0	30	1	T2	0	N0 (i+)	0	1	0	Stage IIA	0	1	1	1	1	0
TCGA-AC-A23G-01A-11R-A213-07	1016.72	0	1	2006	76	1	0	330	11	T1c	1	N1	1	1		Stage IIA	0	1	1	1	1	0
TCGA-A2-A0D1-01A-11R-A034-07	1048.15	0	1	2008	76	1	0	786	26	T2	0	N0 (i-)	0	0	0	Stage IIA	0	0	0	1	1	0
TCGA-E2-A15G-01A-11R-A12D-07	1127.05	0	1	2009	76	1	0	316	10	T2	0	N0	0	0	0	Stage IIA	0	1	1	0	0	0
TCGA-AC-A2QI-01A-12R-A19W-07	1162.51	0	1	2011	76	1	0	28	0	T3	0	N1a	1	1		Stage IIIA	1	1	0	0	0	0
TCGA-A8-A08Z-01A-21R-A00Z-07	1243.8	0	1	2004	76	1	0	1217	40	T4b	0	N3a	1	1	0	Stage IIIB	1	1	1	0	0	0
TCGA-BH-A0BP-01A-11R-A115-07	1256.77	0	1	2006	76	1	0	1481	49	T1c	1	N0	0	0	0	Stage I	0	1	1	0	0	0
TCGA-B6-A40B-01A-11R-A239-07	1348.28	0	1	2005	76	1	0	2521	84	T1b	1	N0 (i-)	0	0	0	Stage I	0	1	1	0	0	0
TCGA-E2-A14O-01A-31R-A115-07	1559.12	0	1	2008	76	1	0	1173	39	T3	0	N1a	1	1	0	Stage IIIA	1	1	1		0	0
TCGA-A8-A07W-01A-11R-A00Z-07	2724.08	1	1	2009	76	1	0	304	10	T2	0	NX			1	Stage IV	1	1	1	0	0	0
TCGA-AN-A0AK-01A-21R-A00Z-07	2752.31	1	1	2010	76	1	0	224	7	T2	0	N0	0	0	0	Stage IIA	0	1	0	1	1	0
TCGA-A8-A099-01A-11R-A00Z-07	3310.89	1	1	2009	76	1	0	304	10	T4b	0	N3a	1	1		Stage X		1	1	1	1	0
TCGA-D8-A1XJ-01A-11R-A14M-07	4773.33	1	1	2010	76	1	0	352	11	T3	0	N1a	1	1		Stage IIIA	1	1	1	1	1	0
TCGA-LL-A6FQ-01A-11R-A31O-07	461.611	0	1	2013	77	1	0	80	2	T2	0	N2a	1	1		Stage IIIA	1	1	1	0	0	0
TCGA-D8-A1JS-01A-11R-A13Q-07	840.065	0	1	2010	77	1	0	105	3	T1c	1	N0	0	0	0	Stage IA	0	1	1	0	0	0
TCGA-WT-AB44-01A-11R-A41B-07	1111.79	0	1	2012	77	1	0	791	26	T1c	1	N0 (i-)	0	0		Stage IA	0	1	1	0	0	0
TCGA-BH-A0W5-01A-11R-A109-07	1173.3	0		2008	77	1	0	543	18	T1c	1	N1a	1	1	0	Stage IIA	0	1	1
TCGA-BH-A0HF-01A-11R-A056-07	1229.07	0	1	2008	77	1	0	727	24	T1c	1	N0 (i-)	0	0	0	Stage IA	0	1	1	0	0	0
TCGA-EW-A1P5-01A-11R-A144-07	1311.13	0	1	2010	77	1	0	365	12	T2	0	N1a	1	1	0	Stage IIB	0	1	1	0	0	0
TCGA-A2-A4S0-01A-21R-A266-07	1712.8	0	1	2012	77	1	0	271	9	T2	0	N0	0	0	0	Stage IIA	0	1	1	0	0	0
TCGA-A8-A06X-01A-21R-A00Z-07	2277.2	1	1	2006	77	1	1	943	31	T3	0	N0	0	0	0	Stage IIB	0	1	0	1	1	0
TCGA-D8-A1J8-01A-11R-A13Q-07	2758.97	1	1	2010	77	1	0	256	8	T2	0	N1a	1	1	0	Stage IIB	0	1	1	0	0	0
TCGA-AO-A1KP-01A-11R-A13Q-07	3256.35	1	1	2003	77	1	0	2513	83	T1	1	N1	1	1	0	Stage IIA	0	1	1	0	0	0
TCGA-E2-A2P6-01A-11R-A19W-07	3303.34	1	1	2011	77	1	0	168	5	T2	0	N1	1	1	0	Stage IIB	0	1	1		0	0
TCGA-BH-A0HI-01A-11R-A084-07	1037.36	0	1	2008	78	1	0	620	20	T1c	1	N0 (i-)	0	0	0	Stage IA	0	1	1	0	0	0
TCGA-E2-A2P5-01A-11R-A19W-07	1195.99	0		2011	78	1	0	326	10	T2	0	N3	1	1	0	Stage IIIC	1	1	1		0	0
TCGA-AO-A1KT-01A-11R-A13Q-07	1386.35	0	1	2009	78	1	0	541	18	T1	1	N1	1	1	0	Stage IIA	0	1	1		0	0
TCGA-BH-A0DO-01B-11R-A12D-07	1424.03	0		2009	78	1	0	525	17	T1c	1	N0	0	0	0	Stage I	0	1	1	0	0	0
TCGA-E2-A1IL-01A-11R-A14D-07	1427.03	0	1	2009	78	1	0	14	0	T1c	1	N1a	1	1	0	Stage IIA	0	1	1	0	0	0
TCGA-A7-A0CG-01A-12R-A056-07	1603.61	0	1	2010	78	1	0	167	5	T2	0	N0 (i-)	0	0	0	Stage IIA	0	1	0	0	0	0
TCGA-E9-A3Q9-01A-11R-A21T-07	1946.62	0	1	2011	78	1	0	31	1	T3	0	N3	1	1	0	Stage IIIC	1	1	1
TCGA-C8-A12Q-01A-11R-A115-07	2179.27	1	1	2010	78	1	0	2	0	T1	1	N2	1	1	0	Stage IIIA	1	0	0	1	1	0
TCGA-BH-A0BV-01A-11R-A00Z-07	2596.7	1	1	2006	78	1	0	1519	50	T2	0	N1a	1	1	0	Stage IIB	0	1	1	0	0	0
TCGA-AC-A2BK-01A-11R-A21T-07	3375.12	1	1	2006	78	1	0	1172	39	T2	0	N2a	1	1		Stage IIIA	1	0	0	0	0	1
TCGA-AC-A3QP-01A-11R-A22U-07	455.101	0	1	2011	79	1	0	286	9	T2	0	N1mi	1	1		Stage IIB	0	1	1		0	0
TCGA-BH-A0E7-01A-11R-A034-07	938.581	0	1	2006	79	1	0	1363	45	T2	0	N1a	1	1	0	Stage IIB	0	1	1	0	0	0
TCGA-A7-A3RF-01A-11R-A22K-07	940.896	0	1	2012	79	1	0	54	1	T2	0	N0	0	0	0	Stage IIA	0	1	1	0	0	0
TCGA-A7-A13G-01A-11R-A13Q-07	1147.78	0		2010	79	1	0	208	6	T2	0	N0	0	0		Stage IIA	0	1	1	0	0	0
TCGA-AC-A2FG-01A-11R-A17B-07	1204.98	0	1	2007	79	1	0	1125	37	T2	0	N1a	1	1		Stage IIB	0	1	0		0	0
TCGA-D8-A1JF-01A-11R-A13Q-07	1226.47	0	1	2010	79	1	0	96	3	T1c	1	N2a	1	1	0	Stage IIIA	1	0	0	0	0	1
TCGA-E2-A105-01A-11R-A10J-07	1231.73	0	1	2007	79	1	0	1163	38	T2	0	N0 (i-)	0	0	0	Stage IIA	0	1	1
TCGA-A7-A0CH-01A-21R-A00Z-07	1293.99	0	1	2009	79	1	0	162	5	T2	0	N0 (i-)	0	0	0	Stage IIA	0
TCGA-A2-A0EU-01A-22R-A056-07	1366.42	0	1	2008	79	1	0	733	24	T1c	1	N0 (i-)	0	0	0	Stage IA	0	1	1	0	0	0
TCGA-BH-A18S-01A-11R-A12D-07	1391.27	0	1	2003	79	1	1	2009	66	T1c	1	N0	0	0	0	Stage I	0	1	1	0	0	0
TCGA-AC-A62Y-01A-11R-A29R-07	1391.43	0	1	2012	79	1	0	55	1	T2	0	N1	1	1		Stage IIB	0	1	1	0	0	0
TCGA-LD-A74U-01A-13R-A33J-07	1462.31	0		2013	79	1	0	203	6	T3	0	N3a	1	1	0	Stage IIIC	1	1	0	0	0	0
TCGA-D8-A73W-01A-22R-A352-07	1488.29	0	1	2013	79	1	0	244	8	T3	0	N1a	1	1		Stage IIIA	1	1	0	0	0	0
TCGA-E2-A14P-01A-31R-A12D-07	2484.18	1	1	2008	79	1	0	487	16	T2	0	N3	1	1	0	Stage IIIC	1	0	0	1	1	0
TCGA-A8-A09G-01A-21R-A00Z-07	2725.13	1	1	2008	79	1	0	0	0	T3	0	N3a	1	1	0	Stage IIIC	1	1	0	1	1	0
TCGA-AN-A0AJ-01A-11R-A00Z-07	5469.91	1	1	2010	79	1	0	244	8	T3	0	N0	0	0	0	Stage IIB	0	1	1	1	1	0
TCGA-BH-A42U-01A-12R-A24H-07	530.112	0	1	2004	80	1	0	3324	110	T1a	1	N0	0	0		Stage IA	0	0	0	0	0	1
TCGA-OL-A66J-01A-11R-A29R-07	650.744	0	1	2008	80	1	0	1658	55	T1c	1	N0	0	0		Stage I	0	1	1		0	0
TCGA-A8-A06U-01A-11R-A00Z-07	830.805	0		2008	80	1	1	883	29	T2	0	N1a	1	1	0	Stage IIB	0	1	1	1	1	0
TCGA-D8-A145-01A-11R-A115-07	1196.93	0	1	2010	80	1	0	49	1	T1c	1	N1a	1	1	0	Stage IIA	0	1	1		0	0
TCGA-A2-A0EV-01A-11R-A034-07	1291.23	0	1	2008	80	1	0	545	18	T1c	1	N0 (i-)	0	0	0	Stage IA	0	1	1	0	0	0
TCGA-D8-A1Y1-01A-21R-A14M-07	1366.41	0	1	2010	80	1	0	116	3	T3	0	N1a	1	1		Stage IIIA	1	1	1	0	0	0
TCGA-AR-A1AP-01A-11R-A12P-07	1915.88	0	1	2007	80	1	0	1216	40	T1	1	N0	0	0	0	Stage I	0	1	1		0	0
TCGA-D8-A1X6-01A-11R-A14M-07	2148.37	0	1	2010	80	1	0	236	7	T3	0	N2a	1	1		Stage IIIA	1	1	1	0	0	0
TCGA-D8-A1JN-01A-11R-A13Q-07	2473.73	1	1	2010	80	1	0	217	7	T3	0	N3a	1	1		Stage IIIC	1	1	1		0	0
TCGA-E2-A1IH-01A-11R-A13Q-07	2597.65	1	1	2008	80	1	0	658	21	T1c	1	N0	0	0	0	Stage I	0	1	1
TCGA-A8-A0A9-01A-11R-A00Z-07	2646.75	1	1	2009	80	1	0	396	13	T2	0	N0	0	0	0	Stage IIA	0	1	1	0	0	0
TCGA-EW-A1IW-01A-11R-A13Q-07	4073.52	1	1	2010	80	1	0	252	8	T2	0	N1a	1	1		Stage IIB	0	1	1	1	1	0
TCGA-A8-A07R-01A-21R-A034-07	4136.25	1		2009	80	1	0	273	9	T2	0	N3a	1	1	0	Stage IIIC	1	0	0	1	1	0
TCGA-C8-A12K-01A-21R-A115-07	4723.32	1	1	2010	80	1	0	0	0	T2	0	N1	1	1	0	Stage IIB	0
TCGA-A8-A081-01A-11R-A00Z-07	5921.98	1	1	2008	80	1	0	0	0	T2	0	N0	0	0	0	Stage IIA	0	1	1	0	0	0
TCGA-BH-A18G-01A-11R-A12D-07	1335.62	0	1	2010	81	1	0	61	2	T1c	1	N0	0	0	0	Stage IA	0	0	0	0	0	1
TCGA-D8-A1XZ-01A-11R-A14M-07	1542.47	0	1	2010	81	1	0	121	4	T1c	1	N2a	1	1		Stage IIIA	1	1	0	0	0	0
TCGA-D8-A1X5-01A-11R-A14D-07	1782.04	0	1	2010	81	1	0	171	5	T2	0	N3a	1	1		Stage IIIC	1	1	1	1	1	0
TCGA-BH-A0HK-01A-11R-A056-07	1957.85	0	1	2010	81	1	0	178	5	T2	0	N1	1	1	0	Stage IIB	0	1	0	0	0	0
TCGA-A8-A084-01A-21R-A00Z-07	2628.64	1		2007	81	1	0	458	15	T2	0	N1a	1	1	0	Stage IIB	0	1	0	0	0	0
TCGA-A8-A07E-01A-11R-A034-07	3149.28	1		2008	81	1	0	608	20	T4b	0	N3a	1	1		Stage X		1	1	0	0	0
TCGA-BH-A0H6-01A-21R-A056-07	848.337	0	1	2008	82	1	0	747	24	T1b	1	NX			0	Stage I	0	1	1	0	0	0
TCGA-S3-AA12-01A-11R-A41B-07	1143.56	0		2013	82	1	0	259	8	T3	0	N1a	1	1		Stage IIIA	1	1	0	0	0	0
TCGA-BH-A0WA-01A-11R-A109-07	1593.41	0		2008	82	1	0	372	12	T1c	1	N0 (i-)	0	0	0	Stage I	0	0	0	0	0	1
TCGA-A8-A09R-01A-11R-A00Z-07	2142.07	0	1	2009	82	1	0	273	9	T2	0	N1	1	1	0	Stage IIB	0	1	1	0	0	0
TCGA-C8-A131-01A-11R-A115-07	2283.45	1	1	2010	82	1	0	14	0	T2	0	N2	1	1	0	Stage IIIA	1	0	0	0	0	1
TCGA-A2-A0SW-01A-11R-A084-07	2393.69	1	1	2006	82	1	1	1365	45	T2	0	N2	1	1	1	Stage IV	1	1	0		0	0
TCGA-A8-A09Z-01A-11R-A00Z-07	1157.74	0	1	2008	83	1	0	0	0	T3	0	N0	0	0	0	Stage IIB	0	1	0	0	0	0
TCGA-A8-A0AD-01A-11R-A056-07	1880.17	0	1	2007	83	1	0	1157	38	T1c	1	N0	0	0	0	Stage I	0	1	1	0	0	0
TCGA-A8-A09Q-01A-11R-A00Z-07	3019.63	1	1	2008	83	1	0	761	25	T4b	0	N2a	1	1	0	Stage IIIB	1	1	1	0	0	0
TCGA-AR-A1AJ-01A-21R-A12P-07	3888.15	1	1	2005	83	1	0	1605	53	T1	1	N0	0	0	0	Stage I	0	1	0	0	0	0
TCGA-LL-A50Y-01A-11R-A266-07	492.713	0		2012	84	1	0	210	7	T2	0	N0	0	0		Stage IIA	0	1	1		0	0
TCGA-A7-A56D-01A-11R-A27Q-07	649.533	0	1	2012	84	1	0	177	5	T2	0	N0	0	0	0	Stage IIA	0	1	1	0	0	0
TCGA-AQ-A1H2-01A-11R-A13Q-07	1199.7	0	1	2010	84	1	0	230	7	T2	0	N2a	1	1		Stage IIIA	1	1	1		1	0
TCGA-AC-A2B8-01A-11R-A17B-07	1256.24	0	1	2011	84	1	0	45	1	T3	0	N0 (i-)	0	0	0	Stage IIB	0	1	1	0	0	0
TCGA-E2-A1LK-01A-21R-A14D-07	1871.66	0	1	2008	84	1	1	266	8	T4b	0	N3a	1	1	0	Stage IIIC	1	0	0		0	1
TCGA-A8-A06Z-01A-11R-A00Z-07	1928.19	0	1	2007	84	1	0	31	1	T3	0	N0	0	0	0	Stage IIB	0	1	1	0	0	0
TCGA-A8-A0A1-01A-11R-A00Z-07	2263.05	1	1	2009	84	1	0	365	12	T2	0	N0	0	0	0	Stage IIA	0	1	1	0	0	0
TCGA-D8-A1XV-01A-11R-A14M-07	3192.68	1	1	2010	84	1	0	147	4	T2	0	N0	0	0	0	Stage IIA	0	1	1		0	0
TCGA-A8-A09I-01A-22R-A034-07	3443.33	1		2008	84	1	0	1006	33	T2	0	N0	0	0	0	Stage IIA	0	1	1	1	1	0
TCGA-A2-A0CO-01A-13R-A22K-07	744.856	0	1	2002	85	1	0	3409	113	T3	0	N0	0	0	0	Stage IIB	0	1	1	0	0	0
TCGA-A8-A07Z-01A-11R-A00Z-07	813.612	0	1	2008	85	1	0	853	28	T2	0	N0	0	0	0	Stage IIA	0	1	1	0	0	0
TCGA-E9-A54X-01A-11R-A266-07	1965.74	0	1	2012	85	1	0	0	0	T1b	1	N0 (i-)	0	0	0	Stage IA	0	1	1	0	0	0
TCGA-D8-A1XC-01A-11R-A14D-07	2736.05	1	1	2010	85	1	0	81	2	T4b	0	N1a	1	1	0	Stage IIIB	1	1	1	0	0	0
TCGA-A2-A1G1-01A-21R-A13Q-07	3316.34	1	1	2010	85	1	0	371	12	T2	0	N1	1	1	0	Stage IIB	0	0	0		1	0
TCGA-D8-A1XG-01A-11R-A14D-07	2224.73	1	1	2010	86	1	0	75	2	T4b	0	N1a	1	1	0	Stage IIIB	1	1	0	0	0	0
TCGA-AC-A3HN-01A-11R-A213-07	1494.25	0	1	2011	87	1	0	21	0	T2	0	N1a	1	1		Stage IIB	0	1	1	0	0	0
TCGA-AC-A2FM-01A-11R-A19W-07	1722.02	0	1	2004	87	1	1	792	26	T2	0	N1mi	1	1	0	Stage IIB	0
TCGA-BH-A8FY-01A-11R-A36F-07	2350.85	1		2012	87	1	1	295	9	T1c	1	N0 (i+)	0	1	0	Stage IA	0	1	1	0	0	0
TCGA-LL-A5YM-01A-11R-A28M-07	925.232	0	1	2012	88	1	0	143	4	T4b	0	NX			0	Stage IIIB	1	1	1		1	0
TCGA-D8-A73U-01A-11R-A33J-07	977.17	0	1	2012	88	1	0	492	16	T2	0	N0	0	0	0	Stage IIA	0	1	1	0	0	0
TCGA-AN-A0FK-01A-11R-A034-07	1537.55	0	1	2010	88	1	0	213	7	T4	0	N0	0	0	0	Stage IIIB	1	1	1	1	1	0
TCGA-BH-A18N-01A-11R-A12D-07	1577.56	0		2001	88	1	1	1148	38	T2	0	N1b	1	1	0	Stage IIA	0	1	1	0	0	0
TCGA-A8-A08A-01A-11R-A32Y-07	711.688	0	1	2007	89	1	0	30	1	T1c	1	N0	0	0	0	Stage I	0	1	1	0	0	0
TCGA-E2-A15O-01A-11R-A115-07	1260.53	0		2010	89	1	0	396	13	T1c	1	NX			0	Stage I	0	1	1		0	0
TCGA-A8-A08L-01A-11R-A00Z-07	4531.73	1	1	2008	89	1	1	304	10	T3	0	N2a	1	1	0	Stage IIIA	1	1	0	0	0	0
TCGA-LL-A6FP-01A-11R-A31O-07	450.269	0	1	2012	90	1	0	352	11	T2	0	NX				Stage IIA	0	1	1		0	0
TCGA-AC-A3W6-01A-12R-A22K-07	1108.83	0		2012	90	1	0	51	1	T3	0	N1	1	1		Stage IIIA	1	1	1	0	0	0
TCGA-A2-A25D-01A-12R-A16F-07	1319.88	0	1	2010	90	1	0	243	8	T2	0	N3a	1	1	0	Stage IIIC	1	1	0	0	0	0
TCGA-D8-A1JK-01A-11R-A13Q-07	1574.27	0	1	2010	90	1	0	109	3	T2	0	N0	0	0	0	Stage IIA	0	0	1	0	0	0
TCGA-E2-A9RU-01A-11R-A41B-07	1758.38	0	1	2013	90	1	0	280	9	T2	0	N3a	1	1		Stage IIIC	1	1	0		0	0
TCGA-AC-A23H-01A-11R-A157-07	2189.39	1	1	2009	90	1	0	81	2	T2	0	NX			0	Stage IIA	0	1	0	1	1	0
TCGA-C8-A26Y-01A-11R-A16F-07	3093.77	1	1	2010	90	1	0	13	0	T2	0	N0	0	0	0	Stage IIA	0	0	0	0	0	1

## Sheet: Sheet2
0.4886	2.047
0.2649 to 0.8468	1.181 to 3.776
